# Supplementary material
Source: PubMed Central journal article supplement (PMC6431574)
Supplement: NIHMS1508565-supplement-1.pdf [file NIHMS1508565-supplement-1.pdf]

Appendix 1.1, Dataset 1 ( GSE28042)

| Input Sample | B cells naive | B cells memory | Plasma cells | T cells CD8 naive | T cells CD4 memory resting | T cells CD4 T cells memory activated | T cells CD4 T cells follicular helper | T cells regulatory (Tregs) | T cells gamma delta | NK cells resting | NK cells activated | Monocytes | Macrophages M1 | Macrophages M2 | Macrophages cells resting | Dendritic cells resting | Dendritic cells activated | Mast cells resting | Mast cells activated | Eosinophils | Neutrophils | P-value | Pearson Correlation | RMSE  |
|--------------|---------------|----------------|--------------|-------------------|----------------------------|--------------------------------------|---------------------------------------|----------------------------|---------------------|------------------|--------------------|-----------|----------------|----------------|---------------------------|-------------------------|---------------------------|--------------------|----------------------|-------------|-------------|---------|---------------------|-------|
| GSM693750    | 0             | 0.02           | 0.003        | 0.037             | 0.009                      | 0.038                                | 0.018                                 | 0.001                      | 0                   | 0.086            | 0                  | 0.000     | 0.002          | 0              | 0.000                     | 0                       | 0                         | 0.026              | 0                    | 0.005       | 0           | 0.000   | 0.758               | 0.656 |
| GSM693751    | 0.008         | 0              | 0            | 0.222             | 0.012                      | 0.109                                | 0.087                                 | 0                          | 0.014               | 0.018            | 0.058              | 0.016     | 0.000          | 0.005          | 0                         | 0.001                   | 0                         | 0.026              | 0                    | 0           | 0           | 0.000   | 0.578               | 0.818 |
| GSM693752    | 0.008         | 0              | 0.003        | 0.174             | 0                          | 0.054                                | 0.042                                 | 0                          | 0                   | 0.095            | 0.008              | 0.000     | 0.007          | 0              | 0                         | 0                       | 0.001                     | 0.018              | 0                    | 0.008       | 0           | 0.000   | 0.706               | 0.718 |
| GSM693753    | 0.01          | 0              | 0            | 0.165             | 0.077                      | 0                                    | 0.025                                 | 0.006                      | 0.002               | 0                | 0.056              | 0         | 0.000          | 0.006          | 0                         | 0                       | 0                         | 0.022              | 0                    | 0           | 0           | 0.000   | 0.711               | 0.713 |
| GSM693754    | 0             | 0.009          | 0.001        | 0.182             | 0.007                      | 0                                    | 0.058                                 | 0                          | 0                   | 0.128            | 0                  | 0.000     | 0.005          | 0              | 0                         | 0                       | 0                         | 0.018              | 0                    | 0           | 0           | 0.000   | 0.673               | 0.745 |
| GSM693755    | 0             | 0.021          | 0.007        | 0.160             | 0.027                      | 0                                    | 0.06                                  | 0.002                      | 0.022               | 0                | 0.086              | 0         | 0.000          | 0.001          | 0                         | 0.001                   | 0                         | 0.013              | 0                    | 0.004       | 0           | 0.000   | 0.591               | 0.808 |
| GSM693756    | 0.001         | 0              | 0            | 0.268             | 0                          | 0                                    | 0.014                                 | 0                          | 0.004               | 0                | 0.12               | 0         | 0.000          | 0.01           | 0                         | 0                       | 0                         | 0.026              | 0                    | 0           | 0           | 0.000   | 0.689               | 0.732 |
| GSM693757    | 0.002         | 0              | 0.001        | 0.252             | 0.025                      | 0                                    | 0.061                                 | 0                          | 0                   | 0.144            | 0                  | 0.000     | 0.005          | 0              | 0                         | 0                       | 0                         | 0.015              | 0                    | 0           | 0           | 0.000   | 0.666               | 0.753 |
| GSM693758    | 0             | 0              | 0            | 0.112             | 0.016                      | 0.009                                | 0.029                                 | 0.005                      | 0.015               | 0                | 0.113              | 0.012     | 0.000          | 0              | 0                         | 0                       | 0                         | 0.046              | 0                    | 0           | 0           | 0.000   | 0.711               | 0.710 |
| GSM693759    | 0.044         | 0              | 0            | 0.063             | 0.043                      | 0                                    | 0.041                                 | 0                          | 0.013               | 0                | 0.035              | 0.004     | 0.000          | 0              | 0                         | 0                       | 0.004                     | 0.016              | 0                    | 0           | 0           | 0.000   | 0.739               | 0.679 |
| GSM693760    | 0             | 0.012          | 0.002        | 0.173             | 0.077                      | 0                                    | 0.017                                 | 0                          | 0.031               | 0                | 0.158              | 0         | 0.000          | 0.005          | 0                         | 0                       | 0                         | 0.022              | 0                    | 0           | 0           | 0.000   | 0.669               | 0.752 |
| GSM693761    | 0.06          | 0              | 0            | 0.185             | 0                          | 0.031                                | 0.088                                 | 0.005                      | 0.019               | 0                | 0.074              | 0         | 0.000          | 0.017          | 0                         | 0                       | 0                         | 0.007              | 0.011                | 0           | 0           | 0.000   | 0.627               | 0.786 |
| GSM693762    | 0             | 0              | 0            | 0.257             | 0.019                      | 0                                    | 0.04                                  | 0                          | 0                   | 0.045            | 0                  | 0.014     | 0.004          | 0              | 0                         | 0                       | 0                         | 0.02               | 0                    | 0           | 0           | 0.000   | 0.726               | 0.701 |
| GSM693763    | 0.05          | 0              | 0            | 0.127             | 0.02                       | 0.045                                | 0.07                                  | 0                          | 0.018               | 0.076            | 0                  | 0         | 0.003          | 0.002          | 0                         | 0                       | 0                         | 0.019              | 0                    | 0           | 0           | 0.000   | 0.614               | 0.791 |
| GSM693764    | 0             | 0.002          | 0.013        | 0.122             | 0.058                      | 0.035                                | 0.017                                 | 0                          | 0.017               | 0                | 0.063              | 0         | 0.013          | 0.008          | 0                         | 0.019                   | 0                         | 0.011              | 0                    | 0           | 0           | 0.000   | 0.602               | 0.798 |
| GSM693765    | 0.017         | 0              | 0            | 0.103             | 0                          | 0.023                                | 0                                     | 0                          | 0                   | 0.085            | 0.01               | 0.000     | 0.002          | 0              | 0                         | 0                       | 0                         | 0.009              | 0                    | 0           | 0           | 0.000   | 0.720               | 0.706 |
| GSM693766    | 0             | 0.029          | 0.006        | 0.169             | 0.055                      | 0                                    | 0.003                                 | 0.001                      | 0.025               | 0                | 0.169              | 0.036     | 0.000          | 0              | 0.003                     | 0                       | 0                         | 0.016              | 0                    | 0           | 0           | 0.000   | 0.603               | 0.797 |
| GSM693767    | 0.017         | 0              | 0.007        | 0.162             | 0.1                        | 0                                    | 0.064                                 | 0.009                      | 0.021               | 0                | 0.044              | 0.018     | 0.010          | 0.016          | 0                         | 0                       | 0                         | 0.027              | 0                    | 0           | 0           | 0.000   | 0.714               | 0.725 |
| GSM693768    | 0.002         | 0              | 0            | 0.157             | 0.005                      | 0                                    | 0.022                                 | 0.011                      | 0.002               | 0                | 0.138              | 0         | 0.000          | 0.003          | 0                         | 0                       | 0                         | 0.028              | 0                    | 0           | 0           | 0.000   | 0.708               | 0.713 |
| GSM693769    | 0.008         | 0              | 0            | 0.140             | 0                          | 0                                    | 0.044                                 | 0                          | 0.018               | 0                | 0.059              | 0.003     | 0.001          | 0.004          | 0                         | 0                       | 0                         | 0.015              | 0                    | 0.002       | 0           | 0.000   | 0.641               | 0.772 |
| GSM693770    | 0.069         | 0              | 0            | 0.105             | 0                          | 0.026                                | 0.085                                 | 0.008                      | 0.009               | 0                | 0.128              | 0         | 0.000          | 0.012          | 0                         | 0                       | 0                         | 0.007              | 0                    | 0           | 0           | 0.000   | 0.690               | 0.737 |
| GSM693771    | 0.042         | 0              | 0            | 0.026             | 0                          | 0.129                                | 0.024                                 | 0.012                      | 0.014               | 0                | 0.185              | 0.013     | 0.000          | 0.023          | 0                         | 0                       | 0                         | 0.001              | 0.005                | 0           | 0           | 0.000   | 0.702               | 0.726 |
| GSM693772    | 0.016         | 0              | 0            | 0.163             | 0                          | 0.033                                | 0                                     | 0                          | 0                   | 0.049            | 0                  | 0.000     | 0.002          | 0              | 0.005                     | 0                       | 0                         | 0.027              | 0                    | 0           | 0           | 0.000   | 0.707               | 0.718 |
| GSM693773    | 0.027         | 0              | 0            | 0.147             | 0                          | 0.037                                | 0.002                                 | 0.008                      | 0                   | 0.073            | 0.003              | 0.000     | 0.021          | 0              | 0                         | 0                       | 0                         | 0.04               | 0                    | 0           | 0           | 0.000   | 0.767               | 0.664 |
| GSM693774    | 0.105         | 0              | 0            | 0.146             | 0                          | 0.151                                | 0.069                                 | 0.013                      | 0.008               | 0.022            | 0.156              | 0         | 0.000          | 0.013          | 0                         | 0                       | 0                         | 0                  | 0.017                | 0.009       | 0           | 0.000   | 0.558               | 0.831 |
| GSM693775    | 0             | 0.021          | 0.006        | 0.143             | 0                          | 0                                    | 0.039                                 | 0                          | 0.016               | 0                | 0.055              | 0         | 0.000          | 0              | 0.001                     | 0                       | 0                         | 0.007              | 0                    | 0           | 0           | 0.000   | 0.609               | 0.794 |
| GSM693776    | 0             | 0.001          | 0.006        | 0.209             | 0                          | 0.111                                | 0.031                                 | 0                          | 0.006               | 0                | 0.087              | 0.001     | 0.000          | 0              | 0                         | 0                       | 0                         | 0                  | 0.004                | 0           | 0           | 0.000   | 0.704               | 0.723 |
| GSM693777    | 0.015         | 0              | 0            | 0.1               | 0                          | 0                                    | 0.045                                 | 0                          | 0.002               | 0                | 0.102              | 0         | 0.000          | 0              | 0                         | 0                       | 0                         | 0                  | 0                    | 0           | 0           | 0.000   | 0.677               | 0.742 |
| GSM693778    | 0.012         | 0              | 0            | 0.221             | 0                          | 0                                    | 0.057                                 | 0                          | 0                   | 0.006            | 0.06               | 0.000     | 0              | 0              | 0                         | 0                       | 0                         | 0.001              | 0                    | 0.038       | 0           | 0.000   | 0.733               | 0.699 |
| GSM693779    | 0.033         | 0              | 0            | 0.114             | 0                          | 0                                    | 0.039                                 | 0.004                      | 0.006               | 0                | 0.082              | 0.038     | 0.000          | 0              | 0                         | 0                       | 0                         | 0                  | 0                    | 0           | 0.004       | 0.000   | 0.681               | 0.741 |
| GSM693780    | 0             | 0.004          | 0.003        | 0.168             | 0                          | 0.033                                | 0                                     | 0.001                      | 0                   | 0.048            | 0.003              | 0.000     | 0.001          | 0              | 0                         | 0                       | 0                         | 0.017              | 0                    | 0           | 0           | 0.000   | 0.634               | 0.775 |
| GSM693781    | 0             | 0.006          | 0.001        | 0.129             | 0.003                      | 0.078                                | 0.041                                 | 0                          | 0                   | 0.097            | 0                  | 0.000     | 0.001          | 0              | 0.002                     | 0                       | 0                         | 0.018              | 0                    | 0           | 0           | 0.000   | 0.718               | 0.707 |
| GSM693782    | 0.025         | 0              | 0            | 0.184             | 0                          | 0                                    | 0.064                                 | 0.014                      | 0.008               | 0                | 0.031              | 0.005     | 0.000          | 0.016          | 0                         | 0                       | 0                         | 0.007              | 0                    | 0           | 0           | 0.000   | 0.710               | 0.713 |
| GSM693783    | 0.044         | 0              | 0            | 0.248             | 0                          | 0.001                                | 0.069                                 | 0.014                      | 0.012               | 0                | 0.107              | 0         | 0.000          | 0.014          | 0.002                     | 0                       | 0                         | 0.03               | 0                    | 0           | 0           | 0.000   | 0.711               | 0.727 |
| GSM693784    | 0             | 0.017          | 0.006        | 0.1               | 0.029                      | 0.126                                | 0.02                                  | 0.001                      | 0.002               | 0                | 0.078              | 0         | 0.000          | 0.003          | 0                         | 0.002                   | 0                         | 0.022              | 0                    | 0           | 0           | 0.000   | 0.607               | 0.795 |
| GSM693785    | 0.054         | 0              | 0            | 0.217             | 0                          | 0                                    | 0.095                                 | 0                          | 0.009               | 0                | 0.054              | 0         | 0.000          | 0.012          | 0                         | 0                       | 0.002                     | 0.004              | 0.023                | 0           | 0           | 0.000   | 0.680               | 0.751 |
| GSM693786    | 0.012         | 0              | 0            | 0.077             | 0.037                      | 0.031                                | 0.032                                 | 0.002                      | 0                   | 0                | 0.082              | 0         | 0.000          | 0.003          | 0                         | 0                       | 0                         | 0.02               | 0                    | 0           | 0.006       | 0.000   | 0.736               | 0.685 |
| GSM693787    | 0.038         | 0              | 0            | 0.24              | 0                          | 0.005                                | 0.025                                 | 0                          | 0.011               | 0                | 0.043              | 0.033     | 0.000          | 0.004          | 0                         | 0.004                   | 0                         | 0.003              | 0.027                | 0           | 0           | 0.000   | 0.721               | 0.710 |
| GSM693788    | 0.051         | 0              | 0            | 0.172             | 0.034                      | 0.013                                | 0.114                                 | 0                          | 0.018               | 0                | 0.046              | 0.015     | 0.000          | 0.012          | 0                         | 0                       | 0                         | 0.02               | 0                    | 0           | 0           | 0.000   | 0.614               | 0.793 |
| GSM693789    | 0.049         | 0              | 0            | 0.137             | 0                          | 0.009                                | 0.032                                 | 0.011                      | 0.013               | 0                | 0.046              | 0.015     | 0.000          | 0.012          | 0                         | 0                       | 0                         | 0.022              | 0                    | 0           | 0           | 0.000   | 0.740               | 0.687 |
| GSM693790    | 0.041         | 0              | 0            | 0.245             | 0.082                      | 0                                    | 0.083                                 | 0                          | 0.03                | 0                | 0.063              | 0.028     | 0.000          | 0.018          | 0                         | 0                       | 0                         | 0.007              | 0.041                | 0           | 0           | 0.000   | 0.600               | 0.807 |
| GSM693791    | 0             | 0.005          | 0.002        | 0.111             | 0.002                      | 0                                    | 0.03                                  | 0                          | 0.004               | 0                | 0.099              | 0.001     | 0.000          | 0.003          | 0                         | 0                       | 0                         | 0.016              | 0                    | 0.002       | 0           | 0.000   | 0.701               | 0.725 |
| GSM693792    | 0.07          | 0              | 0            | 0.255             | 0                          | 0.001                                | 0.089                                 | 0                          | 0.018               | 0                | 0.095              | 0         | 0.000          | 0.018          | 0                         | 0                       | 0                         | 0.008              | 0.011                | 0           | 0           | 0.000   | 0.587               | 0.812 |
| GSM693793    | 0.043         | 0              | 0            | 0.194             | 0                          | 0                                    | 0.089                                 | 0.01                       | 0.016               | 0                | 0.012              | 0.005     | 0.000          | 0.018          | 0.001                     | 0                       | 0                         | 0.022              | 0                    | 0           | 0           | 0.000   | 0.727               | 0.708 |
| GSM693794    | 0             | 0              | 0            | 0.217             | 0                          | 0.003                                | 0.038                                 | 0                          | 0                   | 0.169            | 0                  | 0.000     | 0.005          | 0              | 0.001                     | 0                       | 0                         | 0.019              | 0                    | 0           | 0           | 0.000   | 0.664               | 0.753 |
| GSM693795    | 0             | 0.028          | 0.009        | 0.169             | 0.085                      | 0                                    | 0.013                                 | 0                          | 0.017               | 0                | 0.111              | 0         | 0.000          | 0.001          | 0.004                     | 0                       | 0                         | 0.018              | 0                    | 0           | 0           | 0.000   | 0.574               | 0.819 |
| GSM693796    | 0.038         | 0              | 0            | 0.229             | 0                          | 0                                    | 0.059                                 | 0.012                      | 0.007               | 0                | 0.115              | 0.048     | 0.000          | 0.011          | 0                         | 0                       | 0.003                     | 0.009              | 0                    | 0           | 0           | 0.000   | 0.663               | 0.756 |
| GSM693797    | 0.043         | 0              | 0            | 0.059             | 0.028                      | 0.216                                | 0.113                                 | 0                          | 0.018               | 0                | 0.098              | 0         | 0.000          | 0.011          | 0.001                     | 0                       | 0.003                     | 0                  | 0                    | 0           | 0           | 0.000   | 0.582               | 0.818 |
| GSM693798    | 0.046         | 0              | 0            | 0.121             | 0.038                      | 0                                    | 0.069                                 | 0                          | 0.016               | 0                | 0.039              | 0.018     | 0.000          | 0              | 0                         | 0.012                   | 0                         | 0.003              | 0.035                | 0           | 0           | 0.000   | 0.714               | 0.715 |
| GSM693799    | 0             | 0.015          | 0.004        | 0.271             | 0.036                      | 0                                    | 0.012                                 | 0                          | 0.021               | 0                | 0.105              | 0         | 0.000          | 0.018          | 0                         | 0                       | 0                         | 0.009              | 0                    | 0.001       | 0           | 0.000   | 0.680               | 0.741 |
| GSM693800    | 0.022         | 0              | 0            | 0.1               | 0                          | 0                                    | 0.042                                 | 0.01                       | 0.012               | 0                | 0.096              | 0.046     | 0.000          | 0.015          | 0                         | 0                       | 0                         | 0.052              | 0                    | 0           | 0           | 0.000   | 0.685               | 0.743 |
| GSM693801    | 0             | 0.014          | 0.006        | 0.062             | 0.039                      | 0.043                                | 0.02                                  | 0                          | 0.007               | 0.011            | 0.104              | 0         | 0.000          | 0.003          | 0                         | 0.005                   | 0                         | 0.007              | 0.032                | 0           | 0           | 0.000   | 0.709               | 0.713 |
| GSM693802    | 0             | 0.039          | 0.004        | 0.192             | 0.188                      | 0.038                                | 0.027                                 | 0.005                      | 0.028               | 0                | 0.025              | 0         | 0.000          | 0              | 0.006                     | 0                       | 0                         | 0.011              | 0                    | 0           | 0           | 0.000   | 0.627               | 0.786 |
| GSM693803    | 0.017         | 0.005          | 0.003        | 0.083             | 0.026                      | 0                                    | 0.02                                  | 0                          | 0.024               | 0                | 0.057              | 0.01      | 0.000          | 0.005          | 0                         | 0.002                   | 0                         | 0.029              | 0                    | 0           | 0.001       | 0.000   | 0.738               | 0.682 |
| GSM693804    | 0.031         | 0              | 0            | 0.122             | 0.004                      | 0.015                                | 0.045                                 | 0                          | 0.002               | 0                | 0.077              | 0         | 0.000          | 0.006          | 0                         | 0.003                   | 0                         | 0.033              | 0                    | 0           | 0           | 0.000   | 0.714               | 0.708 |
| GSM693805    | 0.005         | 0              | 0            | 0.138             | 0                          | 0                                    | 0.015                                 | 0.003                      | 0.028               | 0                | 0.06               | 0.02      | 0.000          | 0.008          | 0                         | 0.001                   | 0                         | 0.032              | 0                    | 0           | 0           | 0.000   | 0.657               | 0.761 |
| GSM693806    |               |                |              |                   |                            |                                      |                                       |                            |                     |                  |                    |           |                |                |                           |                         |                           |                    |                      |             |             |         |                     |       |

Appendix 1.2, Dataset 2 (GSE27957)

| Input Sample | B cells naive | B cells memory | Plasma cells | T cells CD8 naive | T cells CD4 memory resting | T cells CD4 memory activated | T cells follicular helper | T cells regulatory (Tregs) | T cells gamma delta | NK cells resting | NK cells activated | Monocytes M0 | Macrophages M1 | Macrophages M2 | Dendritic cells resting | Dendritic cells activated | Mast cells resting | Mast cells activated | Eosinophils | Neutrophils | P-value | Pearson Correlation | RMSE  |       |
|--------------|---------------|----------------|--------------|-------------------|----------------------------|------------------------------|---------------------------|----------------------------|---------------------|------------------|--------------------|--------------|----------------|----------------|-------------------------|---------------------------|--------------------|----------------------|-------------|-------------|---------|---------------------|-------|-------|
| P34          | 0.02          | 0.034          | 0.014        | 0.075             | 0.187                      | 0.139                        | 0.029                     | 0.018                      | 0                   | 0.082            | 0                  | 0.006        | 0.006          | 0              | 0                       | 0                         | 0                  | 0                    | 0.017       | 0.000       | 0.685   | 0.755               |       |       |
| P35          | 0.028         | 0.012          | 0.012        | 0.143             | 0.006                      | 0.175                        | 0.038                     | 0                          | 0                   | 0.224            | 0                  | 0.000        | 0.005          | 0              | 0                       | 0.003                     | 0                  | 0                    | 0.015       | 0.000       | 0.715   | 0.728               |       |       |
| P36          | 0.041         | 0              | 0.005        | 0.08              | 0.022                      | 0.05                         | 0.037                     | 0                          | 0                   | 0.136            | 0                  | 0.001        | 0.005          | 0              | 0                       | 0                         | 0.012              | 0                    | 0.007       | 0.144       | 0.000   | 0.774               | 0.674 |       |
| P37          | 0             | 0.047          | 0.012        | 0.064             | 0                          | 0.014                        | 0                         | 0.034                      | 0                   | 0.082            | 0                  | 0.000        | 0.011          | 0              | 0                       | 0                         | 0.006              | 0                    | 0           | 0.262       | 0.000   | 0.721               | 0.698 |       |
| P38          | 0.021         | 0              | 0            | 0.252             | 0                          | 0.062                        | 0.008                     | 0                          | 0.005               | 0.161            | 0                  | 0.000        | 0.017          | 0              | 0.006                   | 0                         | 0.02               | 0                    | 0           | 0.034       | 0.000   | 0.609               | 0.798 |       |
| P39          | 0.016         | 0.003          | 0.006        | 0.07              | 0.155                      | 0.177                        | 0.016                     | 0                          | 0                   | 0.113            | 0                  | 0.000        | 0.012          | 0              | 0.002                   | 0                         | 0.006              | 0.016                | 0           | 0.033       | 0.000   | 0.654               | 0.774 |       |
| P40          | 0             | 0.027          | 0            | 0.083             | 0.036                      | 0.139                        | 0                         | 0                          | 0.008               | 0.269            | 0                  | 0.000        | 0              | 0              | 0.024                   | 0                         | 0.003              | 0                    | 0           | 0.042       | 0.000   | 0.677               | 0.750 |       |
| P41          | 0.009         | 0              | 0            | 0.133             | 0.035                      | 0.129                        | 0                         | 0                          | 0                   | 0.196            | 0                  | 0.000        | 0              | 0              | 0                       | 0.011                     | 0                  | 0                    | 0           | 0.125       | 0.000   | 0.725               | 0.714 |       |
| P43          | 0.008         | 0.029          | 0.004        | 0.115             | 0.046                      | 0.143                        | 0.028                     | 0                          | 0                   | 0.126            | 0                  | 0.000        | 0              | 0              | 0.025                   | 0                         | 0.002              | 0                    | 0.012       | 0.079       | 0.000   | 0.695               | 0.746 |       |
| P44          | 0             | 0.042          | 0.002        | 0.099             | 0.037                      | 0.203                        | 0                         | 0                          | 0                   | 0.187            | 0                  | 0.000        | 0.001          | 0              | 0.005                   | 0                         | 0.005              | 0.009                | 0           | 0           | 0.000   | 0.739               | 0.712 |       |
| P45          | 0             | 0              | 0.005        | 0.056             | 0.167                      | 0.158                        | 0.048                     | 0                          | 0                   | 0.155            | 0                  | 0.000        | 0              | 0              | 0.02                    | 0                         | 0.006              | 0.011                | 0           | 0           | 0.037   | 0.000               | 0.697 | 0.747 |
| P46          | 0.025         | 0.018          | 0            | 0.08              | 0.132                      | 0.035                        | 0.007                     | 0                          | 0                   | 0                | 0                  | 0.000        | 0.005          | 0              | 0.022                   | 0                         | 0.007              | 0                    | 0           | 0.043       | 0.000   | 0.693               | 0.739 |       |
| P47          | 0             | 0.027          | 0            | 0.119             | 0.044                      | 0.106                        | 0.034                     | 0                          | 0.037               | 0.115            | 0                  | 0.000        | 0              | 0              | 0.029                   | 0                         | 0.021              | 0                    | 0.011       | 0.024       | 0.000   | 0.702               | 0.745 |       |
| P49          | 0             | 0.033          | 0.014        | 0.094             | 0.06                       | 0.175                        | 0.035                     | 0                          | 0                   | 0.2              | 0                  | 0.000        | 0              | 0              | 0.032                   | 0                         | 0.005              | 0                    | 0           | 0.07        | 0.000   | 0.689               | 0.751 |       |
| P51          | 0.008         | 0.016          | 0.01         | 0.053             | 0.132                      | 0.132                        | 0.018                     | 0                          | 0                   | 0.155            | 0                  | 0.000        | 0.006          | 0              | 0.022                   | 0                         | 0.006              | 0                    | 0           | 0.047       | 0.000   | 0.700               | 0.744 |       |
| P54          | 0.008         | 0.04           | 0.009        | 0.075             | 0.113                      | 0.13                         | 0.03                      | 0                          | 0                   | 0.054            | 0                  | 0.000        | 0              | 0              | 0.039                   | 0                         | 0                  | 0.024                | 0           | 0.053       | 0.000   | 0.703               | 0.746 |       |
| P57          | 0             | 0.063          | 0.016        | 0.073             | 0.154                      | 0.073                        | 0.042                     | 0                          | 0                   | 0.12             | 0                  | 0.000        | 0              | 0              | 0.011                   | 0                         | 0.01               | 0                    | 0           | 0.007       | 0.000   | 0.710               | 0.742 |       |
| P58          | 0             | 0.018          | 0.008        | 0.074             | 0.006                      | 0.108                        | 0                         | 0                          | 0.036               | 0.199            | 0                  | 0.000        | 0.004          | 0              | 0.011                   | 0                         | 0                  | 0.027                | 0           | 0.053       | 0.000   | 0.699               | 0.738 |       |
| P62          | 0.004         | 0.027          | 0.009        | 0.03              | 0                          | 0.16                         | 0                         | 0                          | 0                   | 0.279            | 0                  | 0.000        | 0.002          | 0              | 0.013                   | 0                         | 0.002              | 0.026                | 0           | 0.055       | 0.092   | 0.000               | 0.678 | 0.754 |
| P63          | 0             | 0.001          | 0.004        | 0.137             | 0.024                      | 0.124                        | 0.005                     | 0                          | 0.009               | 0.255            | 0                  | 0.000        | 0.006          | 0              | 0                       | 0                         | 0.026              | 0                    | 0           | 0.051       | 0.000   | 0.727               | 0.714 |       |
| P64          | 0.012         | 0.016          | 0.01         | 0.108             | 0.064                      | 0.118                        | 0.037                     | 0                          | 0.005               | 0.254            | 0                  | 0.000        | 0.009          | 0              | 0.013                   | 0                         | 0                  | 0.012                | 0           | 0.012       | 0.000   | 0.730               | 0.719 |       |
| P65          | 0.037         | 0.007          | 0.012        | 0.182             | 0                          | 0.007                        | 0.029                     | 0                          | 0                   | 0.204            | 0                  | 0.000        | 0.019          | 0              | 0.019                   | 0                         | 0.04               | 0                    | 0           | 0.07        | 0.000   | 0.669               | 0.762 |       |
| P66          | 0.03          | 0.035          | 0.016        | 0.105             | 0.076                      | 0.239                        | 0.103                     | 0                          | 0                   | 0.147            | 0                  | 0.187        | 0              | 0              | 0.026                   | 0                         | 0.004              | 0                    | 0.003       | 0.029       | 0.000   | 0.620               | 0.797 |       |
| P69          | 0.088         | 0              | 0.003        | 0.057             | 0.106                      | 0.064                        | 0.033                     | 0                          | 0                   | 0.175            | 0                  | 0.000        | 0.011          | 0              | 0.02                    | 0                         | 0.003              | 0.011                | 0           | 0.046       | 0.000   | 0.695               | 0.751 |       |
| P72          | 0.036         | 0.007          | 0.017        | 0.174             | 0.067                      | 0.06                         | 0.031                     | 0                          | 0                   | 0.149            | 0                  | 0.000        | 0.01           | 0              | 0.019                   | 0                         | 0.007              | 0.002                | 0           | 0.04        | 0.000   | 0.698               | 0.746 |       |
| P73          | 0.019         | 0.011          | 0.009        | 0.118             | 0.007                      | 0.134                        | 0.014                     | 0                          | 0                   | 0.236            | 0                  | 0.237        | 0              | 0              | 0.002                   | 0                         | 0                  | 0                    | 0.005       | 0.208       | 0.000   | 0.688               | 0.738 |       |
| P74          | 0.077         | 0.155          | 0.004        | 0.09              | 0.014                      | 0.004                        | 0.013                     | 0                          | 0.03                | 0.137            | 0                  | 0.000        | 0              | 0              | 0.025                   | 0                         | 0                  | 0.015                | 0           | 0.083       | 0.000   | 0.644               | 0.780 |       |
| P76          | 0.02          | 0.008          | 0.015        | 0.148             | 0                          | 0.03                         | 0.015                     | 0                          | 0.015               | 0.196            | 0                  | 0.000        | 0.023          | 0              | 0                       | 0                         | 0.023              | 0                    | 0           | 0.08        | 0.000   | 0.706               | 0.732 |       |
| P78          | 0.034         | 0.017          | 0.016        | 0.087             | 0.127                      | 0.106                        | 0.009                     | 0                          | 0                   | 0.102            | 0                  | 0.000        | 0.01           | 0              | 0                       | 0                         | 0                  | 0.014                | 0.086       | 0.000       | 0.714   | 0.734               |       |       |
| P79          | 0             | 0.016          | 0.004        | 0.043             | 0                          | 0.248                        | 0                         | 0                          | 0                   | 0.179            | 0.014              | 0.000        | 0.01           | 0              | 0.013                   | 0                         | 0.006              | 0.015                | 0           | 0.049       | 0.000   | 0.655               | 0.770 |       |
| P80          | 0.056         | 0.02           | 0.008        | 0.026             | 0.043                      | 0.075                        | 0                         | 0                          | 0.024               | 0.108            | 0                  | 0.09         | 0              | 0              | 0.018                   | 0                         | 0                  | 0.009                | 0           | 0.000       | 0.802   | 0.606               |       |       |
| P81          | 0             | 0.027          | 0.015        | 0.063             | 0.005                      | 0.042                        | 0                         | 0                          | 0.005               | 0.191            | 0                  | 0.000        | 0.019          | 0              | 0.009                   | 0                         | 0.001              | 0.041                | 0           | 0.082       | 0.000   | 0.777               | 0.674 |       |
| P82          | 0.033         | 0.007          | 0.006        | 0.121             | 0                          | 0.145                        | 0.005                     | 0                          | 0.02                | 0.169            | 0                  | 0.000        | 0.017          | 0              | 0                       | 0                         | 0.002              | 0.02                 | 0           | 0.018       | 0.000   | 0.733               | 0.719 |       |
| P94          | 0.063         | 0              | 0.009        | 0.035             | 0                          | 0.19                         | 0.003                     | 0                          | 0.001               | 0.075            | 0                  | 0.000        | 0              | 0              | 0.038                   | 0                         | 0                  | 0                    | 0.007       | 0.093       | 0.000   | 0.792               | 0.667 |       |
| P95          | 0.041         | 0.005          | 0.013        | 0.092             | 0.199                      | 0.195                        | 0.011                     | 0                          | 0                   | 0.018            | 0                  | 0.000        | 0              | 0              | 0.029                   | 0                         | 0                  | 0.021                | 0           | 0.029       | 0.061   | 0.000               | 0.679 | 0.760 |
| P97          | 0             | 0.036          | 0.013        | 0.057             | 0.008                      | 0.144                        | 0.005                     | 0                          | 0                   | 0.148            | 0                  | 0.000        | 0.006          | 0              | 0                       | 0.011                     | 0.016              | 0                    | 0           | 0.1         | 0.000   | 0.681               | 0.750 |       |
| P98          | 0.056         | 0.051          | 0            | 0.036             | 0.065                      | 0.107                        | 0.019                     | 0                          | 0.002               | 0.15             | 0                  | 0.000        | 0              | 0              | 0.012                   | 0                         | 0.005              | 0.015                | 0           | 0.177       | 0.000   | 0.687               | 0.749 |       |
| P99          | 0.051         | 0.03           | 0.013        | 0.109             | 0                          | 0.219                        | 0.031                     | 0                          | 0                   | 0.128            | 0                  | 0.000        | 0.002          | 0              | 0.016                   | 0                         | 0.002              | 0                    | 0           | 0.057       | 0.000   | 0.732               | 0.726 |       |
| P100         | 0.068         | 0.017          | 0.002        | 0.061             | 0.137                      | 0.108                        | 0.035                     | 0                          | 0.023               | 0.199            | 0                  | 0.000        | 0.005          | 0              | 0.011                   | 0                         | 0                  | 0                    | 0           | 0.016       | 0.000   | 0.682               | 0.758 |       |
| P101         | 0.086         | 0              | 0.005        | 0.13              | 0.053                      | 0.065                        | 0.025                     | 0                          | 0.021               | 0.269            | 0                  | 0.268        | 0              | 0              | 0.024                   | 0                         | 0                  | 0.028                | 0           | 0.027       | 0.000   | 0.676               | 0.756 |       |
| P102         | 0.027         | 0.002          | 0            | 0.073             | 0.139                      | 0.129                        | 0                         | 0                          | 0                   | 0.22             | 0                  | 0.000        | 0              | 0              | 0.023                   | 0                         | 0                  | 0.012                | 0           | 0.023       | 0.000   | 0.664               | 0.764 |       |
| P104         | 0.091         | 0.027          | 0.001        | 0.03              | 0.026                      | 0.111                        | 0.026                     | 0                          | 0.008               | 0.18             | 0                  | 0.000        | 0.062          | 0              | 0                       | 0                         | 0                  | 0.01                 | 0           | 0.023       | 0.000   | 0.624               | 0.795 |       |
| P105         | 0.045         | 0.001          | 0.003        | 0.082             | 0.079                      | 0.177                        | 0.024                     | 0                          | 0                   | 0.091            | 0                  | 0.000        | 0.004          | 0              | 0.014                   | 0                         | 0                  | 0.005                | 0           | 0.035       | 0.000   | 0.732               | 0.722 |       |
| P107         | 0.088         | 0.023          | 0            | 0.08              | 0.083                      | 0.097                        | 0.013                     | 0                          | 0                   | 0.11             | 0                  | 0.000        | 0.002          | 0              | 0.034                   | 0                         | 0.005              | 0.009                | 0           | 0.013       | 0.035   | 0.000               | 0.719 | 0.737 |
| P108         | 0.095         | 0              | 0.006        | 0.181             | 0.04                       | 0.135                        | 0.074                     | 0                          | 0                   | 0.211            | 0                  | 0.181        | 0              | 0              | 0.025                   | 0                         | 0.005              | 0                    | 0           | 0.013       | 0.034   | 0.000               | 0.661 | 0.767 |

Appendix 1.3, Dataset 3 (GSE93606)

| Input Sample | B cells naive | B cells memory | Plasma cells | T cells CD8 | T cells CD4 | T cells CD4 memory | T cells CD4T cells memory | T cells CD4T cells follicular helper | T cells regulatory (Tregs) | T cells gamma delta | NK cells resting | NK cells activated | Monocytes | Macrophages M0 | Macrophages M1 | Macrophages M2 | Dendritic cells resting | Dendritic cells activated | Mast cells resting | Mast cells activated | Eosinophils | Neutrophils | P-value | Pearson Correlation | RMSE  |
|--------------|---------------|----------------|--------------|-------------|-------------|--------------------|---------------------------|--------------------------------------|----------------------------|---------------------|------------------|--------------------|-----------|----------------|----------------|----------------|-------------------------|---------------------------|--------------------|----------------------|-------------|-------------|---------|---------------------|-------|
| GSM2458563   | 0.013         | 0              | 0.006        | 0.109       | 0.062       | 0.069              | 0.04                      | 0                                    | 0                          | 0.167               | 0                | 0                  | 0.171     | 0.003          | 0              | 0              | 0                       | 0.007                     | 0.02               | 0                    | 0           | 0.000       | 0.725   | 0.702               |       |
| GSM2458564   | 0.011         | 0.001          | 0.001        | 0.032       | 0.082       | 0.116              | 0.029                     | 0                                    | 0                          | 0.119               | 0                | 0.17               | 0.122     | 0.003          | 0              | 0              | 0                       | 0.004                     | 0.02               | 0                    | 0           | 0.000       | 0.718   | 0.702               |       |
| GSM2458565   | 0.016         | 0              | 0.007        | 0.036       | 0.188       | 0.041              | 0.02                      | 0                                    | 0                          | 0.072               | 0                | 0                  | 0.161     | 0              | 0              | 0              | 0                       | 0.005                     | 0.002              | 0                    | 0           | 0.000       | 0.758   | 0.659               |       |
| GSM2458566   | 0.027         | 0              | 0.001        | 0.091       | 0.097       | 0.093              | 0.029                     | 0                                    | 0                          | 0.084               | 0                | 0                  | 0.122     | 0.003          | 0              | 0              | 0                       | 0                         | 0.001              | 0                    | 0           | 0.000       | 0.724   | 0.702               |       |
| GSM2458567   | 0.057         | 0              | 0            | 0.163       | 0.221       | 0.121              | 0.024                     | 0                                    | 0                          | 0.034               | 0.028            | 0                  | 0.109     | 0              | 0              | 0              | 0                       | 0.002                     | 0.01               | 0                    | 0           | 0.231       | 0.000   | 0.651               | 0.767 |
| GSM2458568   | 0.028         | 0              | 0            | 0.109       | 0.048       | 0.092              | 0.029                     | 0                                    | 0                          | 0.068               | 0                | 0.189              | 0         | 0              | 0              | 0              | 0                       | 0.003                     | 0.018              | 0                    | 0           | 0.000       | 0.749   | 0.674               |       |
| GSM2458569   | 0.015         | 0.014          | 0            | 0.035       | 0.132       | 0.1                | 0.029                     | 0                                    | 0                          | 0.164               | 0                | 0                  | 0.178     | 0              | 0              | 0              | 0.003                   | 0.002                     | 0.01               | 0                    | 0           | 0.000       | 0.695   | 0.731               |       |
| GSM2458570   | 0.016         | 0              | 0            | 0.128       | 0.03        | 0.023              | 0.039                     | 0                                    | 0                          | 0.116               | 0                | 0.047              | 0.09      | 0              | 0              | 0              | 0.001                   | 0.002                     | 0.006              | 0                    | 0           | 0.000       | 0.769   | 0.645               |       |
| GSM2458571   | 0.101         | 0              | 0.002        | 0.101       | 0.14        | 0                  | 0.029                     | 0                                    | 0                          | 0.025               | 0.047            | 0                  | 0.085     | 0              | 0              | 0              | 0                       | 0.008                     | 0.024              | 0                    | 0           | 0.000       | 0.717   | 0.705               |       |
| GSM2458572   | 0.011         | 0              | 0.006        | 0.059       | 0.146       | 0.092              | 0.064                     | 0                                    | 0                          | 0.103               | 0.067            | 0                  | 0.144     | 0              | 0              | 0              | 0                       | 0.01                      | 0                  | 0                    | 0           | 0.000       | 0.736   | 0.702               |       |
| GSM2458573   | 0.04          | 0              | 0            | 0.048       | 0.152       | 0.001              | 0.041                     | 0                                    | 0                          | 0.244               | 0                | 0.183              | 0.002     | 0              | 0              | 0              | 0                       | 0.006                     | 0.001              | 0                    | 0           | 0.000       | 0.718   | 0.712               |       |
| GSM2458574   | 0.016         | 0.013          | 0            | 0.036       | 0.102       | 0.019              | 0.054                     | 0                                    | 0                          | 0.124               | 0                | 0.09               | 0         | 0              | 0.01           | 0              | 0                       | 0.005                     | 0.011              | 0                    | 0           | 0.000       | 0.728   | 0.688               |       |
| GSM2458575   | 0.042         | 0              | 0            | 0.1         | 0.174       | 0.122              | 0.039                     | 0                                    | 0                          | 0.016               | 0.042            | 0                  | 0.22      | 0              | 0              | 0              | 0                       | 0.004                     | 0.01               | 0                    | 0           | 0.000       | 0.688   | 0.743               |       |
| GSM2458576   | 0.023         | 0              | 0.005        | 0.059       | 0.132       | 0.034              | 0.035                     | 0                                    | 0                          | 0.134               | 0                | 0.14               | 0         | 0              | 0.005          | 0              | 0                       | 0.008                     | 0.014              | 0                    | 0           | 0.000       | 0.719   | 0.704               |       |
| GSM2458577   | 0.027         | 0              | 0            | 0.029       | 0.143       | 0.081              | 0.065                     | 0                                    | 0                          | 0.131               | 0                | 0.047              | 0         | 0              | 0.013          | 0              | 0                       | 0.004                     | 0                  | 0                    | 0           | 0.000       | 0.685   | 0.735               |       |
| GSM2458578   | 0             | 0              | 0.007        | 0.062       | 0.117       | 0.072              | 0.021                     | 0                                    | 0                          | 0.134               | 0                | 0                  | 0.139     | 0              | 0              | 0.003          | 0                       | 0.002                     | 0.016              | 0                    | 0           | 0.000       | 0.717   | 0.703               |       |
| GSM2458579   | 0.022         | 0              | 0.013        | 0.024       | 0.114       | 0.078              | 0.019                     | 0                                    | 0                          | 0.091               | 0                | 0.141              | 0         | 0              | 0              | 0.005          | 0                       | 0.005                     | 0                  | 0                    | 0           | 0.000       | 0.776   | 0.639               |       |
| GSM2458580   | 0.013         | 0              | 0.006        | 0.066       | 0.164       | 0.041              | 0.03                      | 0                                    | 0                          | 0.127               | 0                | 0.146              | 0.002     | 0              | 0              | 0              | 0                       | 0.01                      | 0                  | 0                    | 0           | 0.000       | 0.739   | 0.687               |       |
| GSM2458581   | 0.022         | 0              | 0.001        | 0.101       | 0.101       | 0.042              | 0.002                     | 0                                    | 0                          | 0.18                | 0                | 0.163              | 0.002     | 0              | 0              | 0              | 0                       | 0.014                     | 0                  | 0                    | 0           | 0.000       | 0.709   | 0.712               |       |
| GSM2458582   | 0.004         | 0.007          | 0.006        | 0.072       | 0.135       | 0.021              | 0.017                     | 0                                    | 0                          | 0.247               | 0                | 0.214              | 0.018     | 0              | 0              | 0              | 0                       | 0.002                     | 0                  | 0                    | 0           | 0.000       | 0.674   | 0.746               |       |
| GSM2458583   | 0.006         | 0              | 0.012        | 0.208       | 0.068       | 0.024              | 0.046                     | 0                                    | 0                          | 0.046               | 0.066            | 0                  | 0.133     | 0              | 0              | 0.02           | 0                       | 0.009                     | 0                  | 0                    | 0           | 0.000       | 0.686   | 0.734               |       |
| GSM2458584   | 0             | 0.011          | 0.008        | 0.049       | 0.053       | 0.012              | 0.045                     | 0                                    | 0                          | 0.071               | 0                | 0.098              | 0.017     | 0              | 0              | 0.004          | 0                       | 0                         | 0.028              | 0                    | 0           | 0.000       | 0.742   | 0.671               |       |
| GSM2458585   | 0             | 0              | 0.006        | 0.192       | 0.078       | 0.033              | 0.05                      | 0                                    | 0                          | 0.201               | 0.096            | 0                  | 0.035     | 0              | 0              | 0.01           | 0                       | 0.002                     | 0.007              | 0                    | 0           | 0.000       | 0.711   | 0.706               |       |
| GSM2458586   | 0.035         | 0              | 0            | 0.078       | 0.067       | 0                  | 0.056                     | 0                                    | 0                          | 0.019               | 0.128            | 0                  | 0.076     | 0              | 0              | 0.006          | 0                       | 0.001                     | 0.007              | 0                    | 0           | 0.000       | 0.735   | 0.681               |       |
| GSM2458587   | 0.054         | 0              | 0.006        | 0.05        | 0.084       | 0.023              | 0.041                     | 0                                    | 0                          | 0.037               | 0.113            | 0                  | 0.082     | 0              | 0              | 0.013          | 0                       | 0.006                     | 0                  | 0.009                | 0           | 0.000       | 0.736   | 0.684               |       |
| GSM2458588   | 0.03          | 0              | 0.003        | 0.064       | 0.077       | 0.006              | 0.032                     | 0                                    | 0                          | 0.129               | 0                | 0.108              | 0         | 0              | 0.012          | 0              | 0                       | 0.001                     | 0.002              | 0                    | 0           | 0.000       | 0.738   | 0.677               |       |
| GSM2458589   | 0.03          | 0              | 0            | 0.061       | 0.133       | 0                  | 0.027                     | 0                                    | 0                          | 0.044               | 0.14             | 0                  | 0.044     | 0              | 0              | 0.021          | 0                       | 0.003                     | 0                  | 0.001                | 0.001       | 0.000       | 0.734   | 0.683               |       |
| GSM2458590   | 0             | 0.023          | 0            | 0.131       | 0.081       | 0.016              | 0.054                     | 0                                    | 0                          | 0.031               | 0.089            | 0                  | 0.069     | 0              | 0              | 0.02           | 0                       | 0.008                     | 0                  | 0                    | 0           | 0.000       | 0.739   | 0.681               |       |
| GSM2458591   | 0             | 0.01           | 0.001        | 0.077       | 0.066       | 0                  | 0.009                     | 0                                    | 0                          | 0.119               | 0                | 0.227              | 0.023     | 0              | 0              | 0              | 0                       | 0                         | 0.007              | 0                    | 0           | 0.000       | 0.756   | 0.658               |       |
| GSM2458592   | 0.02          | 0              | 0.004        | 0.171       | 0.053       | 0                  | 0.013                     | 0                                    | 0                          | 0.006               | 0.122            | 0                  | 0.111     | 0              | 0              | 0.014          | 0                       | 0.001                     | 0.013              | 0                    | 0           | 0.000       | 0.729   | 0.689               |       |
| GSM2458593   | 0.009         | 0              | 0.011        | 0.143       | 0.079       | 0                  | 0.012                     | 0                                    | 0                          | 0.031               | 0.114            | 0                  | 0.074     | 0              | 0              | 0.013          | 0                       | 0                         | 0.002              | 0                    | 0           | 0.000       | 0.728   | 0.689               |       |
| GSM2458594   | 0.003         | 0              | 0.006        | 0.106       | 0.05        | 0.011              | 0.042                     | 0                                    | 0                          | 0.077               | 0.107            | 0                  | 0.112     | 0              | 0              | 0.004          | 0                       | 0.003                     | 0.007              | 0                    | 0           | 0.000       | 0.737   | 0.680               |       |
| GSM2458595   | 0.012         | 0              | 0.005        | 0.182       | 0.02        | 0                  | 0.034                     | 0                                    | 0                          | 0.025               | 0.057            | 0                  | 0.074     | 0              | 0              | 0.006          | 0                       | 0                         | 0.009              | 0                    | 0           | 0.000       | 0.748   | 0.666               |       |
| GSM2458596   | 0.025         | 0              | 0            | 0.035       | 0.177       | 0.049              | 0.046                     | 0                                    | 0                          | 0.003               | 0.107            | 0                  | 0.066     | 0              | 0              | 0.033          | 0                       | 0.006                     | 0                  | 0                    | 0.002       | 0.000       | 0.680   | 0.735               |       |
| GSM2458597   | 0             | 0.011          | 0.002        | 0.166       | 0.046       | 0.011              | 0.048                     | 0                                    | 0                          | 0                   | 0.066            | 0                  | 0.188     | 0              | 0              | 0              | 0                       | 0.028                     | 0                  | 0                    | 0           | 0.000       | 0.703   | 0.714               |       |
| GSM2458598   | 0.002         | 0              | 0.016        | 0.1         | 0.079       | 0                  | 0.016                     | 0                                    | 0                          | 0.109               | 0                | 0.155              | 0         | 0              | 0.003          | 0              | 0                       | 0                         | 0.003              | 0                    | 0           | 0.000       | 0.728   | 0.687               |       |
| GSM2458599   | 0.002         | 0              | 0.013        | 0.032       | 0.103       | 0                  | 0.007                     | 0                                    | 0                          | 0.044               | 0.086            | 0                  | 0.087     | 0              | 0              | 0.017          | 0                       | 0                         | 0.018              | 0                    | 0           | 0.000       | 0.729   | 0.686               |       |
| GSM2458600   | 0.009         | 0.005          | 0            | 0.171       | 0.105       | 0.056              | 0.057                     | 0                                    | 0                          | 0.072               | 0.04             | 0                  | 0.05      | 0.025          | 0              | 0              | 0                       | 0.007                     | 0                  | 0                    | 0           | 0.000       | 0.708   | 0.715               |       |
| GSM2458601   | 0             | 0.08           | 0            | 0.164       | 0.067       | 0.135              | 0.018                     | 0                                    | 0                          | 0.05                | 0.021            | 0                  | 0.111     | 0              | 0              | 0.011          | 0                       | 0.003                     | 0.005              | 0                    | 0           | 0.000       | 0.669   | 0.751               |       |
| GSM2458602   | 0.011         | 0              | 0.008        | 0.202       | 0.054       | 0.034              | 0.034                     | 0                                    | 0                          | 0.091               | 0                | 0.182              | 0         | 0              | 0.018          | 0              | 0                       | 0.007                     | 0.006              | 0                    | 0           | 0.000       | 0.744   | 0.682               |       |
| GSM2458603   | 0.004         | 0.019          | 0            | 0.175       | 0.034       | 0.038              | 0.048                     | 0                                    | 0                          | 0                   | 0.086            | 0                  | 0.083     | 0              | 0              | 0.002          | 0                       | 0                         | 0.006              | 0                    | 0           | 0.000       | 0.733   | 0.684               |       |
| GSM2458604   | 0             | 0              | 0.004        | 0.134       | 0.061       | 0.06               | 0.028                     | 0                                    | 0                          | 0.022               | 0.044            | 0                  | 0.088     | 0              | 0              | 0.01           | 0                       | 0.003                     | 0.013              | 0                    | 0           | 0.000       | 0.751   | 0.663               |       |
| GSM2458605   | 0.011         | 0              | 0.007        | 0.144       | 0.015       | 0                  | 0.033                     | 0                                    | 0                          | 0.029               | 0.079            | 0                  | 0.056     | 0              | 0              | 0.006          | 0                       | 0.001                     | 0.002              | 0                    | 0           | 0.000       | 0.784   | 0.624               |       |
| GSM2458606   | 0             | 0.006          | 0            | 0.102       | 0.039       | 0                  | 0.034                     | 0                                    | 0                          | 0.073               | 0.086            | 0                  | 0.103     | 0              | 0              | 0.01           | 0                       | 0                         | 0                  | 0                    | 0           | 0.000       | 0.740   | 0.674               |       |
| GSM2458607   | 0.06          | 0.029          | 0.08         | 0.083       | 0.084       | 0.007              | 0.037                     | 0                                    | 0                          | 0.045               | 0.01             | 0                  | 0.107     | 0              | 0              | 0.006          | 0                       | 0.001                     | 0.014              | 0                    | 0           | 0.000       | 0.701   | 0.719               |       |
| GSM2458608   | 0.058         | 0.008          | 0            | 0.063       | 0.186       | 0.074              | 0.034                     | 0                                    | 0                          | 0.02                | 0.015            | 0                  | 0.205     | 0              | 0              | 0.003          | 0                       | 0.005                     | 0.016              | 0                    | 0           | 0.000       | 0.698   | 0.729               |       |
| GSM2458609   | 0.01          | 0              | 0.01         | 0.023       | 0.097       | 0.037              | 0.041                     | 0                                    | 0                          | 0.029               | 0.098            | 0                  | 0.068     | 0              | 0              | 0.018          | 0                       | 0                         | 0                  | 0                    | 0           | 0.000       | 0.748   | 0.666               |       |
| GSM2458610   | 0.008         | 0              | 0.007        | 0.032       | 0.084       | 0.003              | 0.037                     | 0                                    | 0                          | 0.006               | 0.039            | 0                  | 0.166     | 0              | 0              | 0.011          | 0                       | 0                         | 0.019              | 0                    | 0           | 0.000       | 0.746   | 0.666               |       |
| GSM2458611   | 0.007         | 0.013          | 0.019        | 0.111       | 0.066       | 0.013              | 0.065                     | 0                                    | 0                          | 0.148               | 0                | 0.065              | 0         | 0              | 0.005          | 0              | 0.002                   | 0.011                     | 0                  | 0                    | 0           | 0.000       | 0.703   | 0.714               |       |
| GSM2458612   | 0.005         | 0.002          | 0.005        | 0.093       | 0.109       | 0.065              | 0.053                     | 0                                    | 0                          | 0.107               | 0                | 0.066              | 0         | 0              | 0              | 0              | 0                       | 0                         | 0.011              | 0                    | 0           | 0.000       | 0.731   | 0.688               |       |
| GSM2458613   | 0.012         | 0              | 0.005        | 0.12        | 0.067       | 0.002              | 0.06                      | 0                                    | 0                          | 0.062               | 0.087            | 0                  | 0.063     | 0              | 0              | 0.005          | 0                       | 0                         | 0                  | 0                    | 0           | 0.000       | 0.742   | 0.674               |       |
| GSM2458614   | 0.009         | 0.004          | 0            | 0.113       | 0.127       | 0.01               | 0.033                     | 0                                    | 0                          | 0                   | 0.133            | 0                  | 0.058     | 0              | 0              | 0.004          | 0                       | 0                         | 0.025              | 0                    | 0           | 0.000       | 0.723   | 0.695               |       |
| GSM2458615   | 0.001         | 0.005          | 0.004        | 0.092       | 0.076       | 0                  | 0.016                     | 0                                    | 0                          | 0                   | 0.204            | 0                  | 0.048     | 0              | 0              | 0.007          | 0                       | 0                         | 0                  | 0                    | 0           | 0.000       | 0.743   | 0.671               |       |
| GSM2458616   | 0.004         | 0.037          | 0.012        | 0.037       | 0.09        | 0                  | 0.025                     | 0                                    | 0                          | 0.001               | 0.09             | 0                  | 0.029     | 0              | 0              | 0.018          | 0                       | 0                         | 0.009              | 0                    | 0           | 0.000       | 0.768   | 0.644               |       |
| GSM2458617   | 0.013         | 0              | 0.005        | 0.049       | 0.067       | 0.024              | 0.024                     | 0                                    | 0                          | 0.07                | 0                | 0.169              | 0.019     | 0              | 0              | 0              | 0                       | 0                         | 0.012              | 0                    | 0           | 0.000       | 0.802   | 0.601               |       |
| GSM2458618   | 0             | 0.016          | 0.004        | 0.022       | 0.045       | 0.019              | 0.026                     | 0                                    | 0                          | 0.069               | 0                | 0.073              | 0.023     | 0              | 0              | 0.007          | 0                       | 0                         | 0.012              | 0                    | 0           | 0.000       | 0.78    |                     |       |

| Input Sample | B cells naive | B cells memory | Plasma cells | T cells CD8 naive | T cells CD4 memory resting | T cells CD4 memory activated | T cells CD4 T follicular helper | T cells regulatory (Tregs) | T cells gamma delta | NK cells resting | NK cells activated | Monocytes | Macrophages M0 | Macrophages M1 | Macrophages M2 | Dendritic cells resting | Dendritic cells activated | Mast cells resting | Mast cells activated | Eosinophils | Neutrophils | P-value | Pearson Correlation | RMSE |
|--------------|---------------|----------------|--------------|-------------------|----------------------------|------------------------------|---------------------------------|----------------------------|---------------------|------------------|--------------------|-----------|----------------|----------------|----------------|-------------------------|---------------------------|--------------------|----------------------|-------------|-------------|---------|---------------------|------|
| GSM2458660   | 0.018         | 0              | 0.006        | 0.098             | 0.07                       | 0                            | 0.042                           | 0                          | 0                   | 0.137            | 0                  | 0.062     | 0              | 0              | 0.022          | 0                       | 0                         | 0                  | 0                    | 0           | 0.000       | 0.736   | 0.679               |      |
| GSM2458661   | 0.035         | 0              | 0.004        | 0.057             | 0.051                      | 0                            | 0.028                           | 0                          | 0                   | 0.108            | 0                  | 0.189     | 0.02           | 0              | 0.003          | 0                       | 0                         | 0.016              | 0                    | 0           | 0.000       | 0.719   | 0.696               |      |
| GSM2458662   | 0.029         | 0              | 0.001        | 0.054             | 0.037                      | 0.014                        | 0.028                           | 0                          | 0                   | 0.08             | 0                  | 0.136     | 0.011          | 0              | 0.003          | 0                       | 0                         | 0.012              | 0                    | 0           | 0.000       | 0.735   | 0.680               |      |
| GSM2458663   | 0.027         | 0              | 0.005        | 0.045             | 0.053                      | 0.001                        | 0.021                           | 0                          | 0                   | 0.076            | 0                  | 0.121     | 0              | 0              | 0.01           | 0                       | 0                         | 0.023              | 0                    | 0           | 0.000       | 0.741   | 0.674               |      |
| GSM2458664   | 0.028         | 0              | 0.009        | 0.056             | 0.057                      | 0                            | 0.018                           | 0                          | 0                   | 0.109            | 0                  | 0.069     | 0              | 0              | 0.011          | 0                       | 0                         | 0.019              | 0                    | 0           | 0.000       | 0.731   | 0.686               |      |
| GSM2458665   | 0.011         | 0              | 0.013        | 0.059             | 0.064                      | 0                            | 0.023                           | 0                          | 0                   | 0.143            | 0                  | 0.027     | 0              | 0              | 0.013          | 0                       | 0                         | 0                  | 0                    | 0           | 0.000       | 0.748   | 0.667               |      |
| GSM2458666   | 0.026         | 0              | 0.004        | 0.12              | 0.018                      | 0                            | 0.038                           | 0                          | 0                   | 0.094            | 0                  | 0.062     | 0.017          | 0              | 0.001          | 0                       | 0                         | 0.019              | 0                    | 0           | 0.000       | 0.714   | 0.702               |      |
| GSM2458667   | 0.005         | 0.003          | 0.006        | 0.072             | 0.049                      | 0                            | 0.047                           | 0                          | 0                   | 0.106            | 0                  | 0.087     | 0.016          | 0              | 0.001          | 0                       | 0                         | 0.016              | 0                    | 0           | 0.000       | 0.719   | 0.696               |      |
| GSM2458668   | 0             | 0.013          | 0.005        | 0.091             | 0.011                      | 0.003                        | 0.038                           | 0                          | 0                   | 0.093            | 0                  | 0.147     | 0.03           | 0              | 0              | 0                       | 0                         | 0.007              | 0                    | 0           | 0.000       | 0.742   | 0.671               |      |
| GSM2458669   | 0.041         | 0              | 0            | 0.175             | 0.011                      | 0.031                        | 0                               | 0                          | 0                   | 0.024            | 0.104              | 0         | 0.134          | 0              | 0              | 0                       | 0                         | 0.011              | 0                    | 0           | 0.000       | 0.738   | 0.680               |      |
| GSM2458670   | 0.036         | 0              | 0            | 0.13              | 0.067                      | 0                            | 0.002                           | 0                          | 0                   | 0.013            | 0.175              | 0         | 0.136          | 0              | 0              | 0.003                   | 0                         | 0.009              | 0                    | 0           | 0.000       | 0.736   | 0.684               |      |
| GSM2458671   | 0.023         | 0.005          | 0            | 0.103             | 0.052                      | 0.002                        | 0.002                           | 0                          | 0                   | 0.127            | 0                  | 0.145     | 0              | 0              | 0.009          | 0                       | 0.001                     | 0                  | 0                    | 0           | 0.000       | 0.746   | 0.668               |      |
| GSM2458672   | 0.036         | 0              | 0.004        | 0.096             | 0.04                       | 0                            | 0.022                           | 0                          | 0                   | 0.042            | 0.092              | 0         | 0.07           | 0              | 0              | 0.012                   | 0                         | 0.006              | 0.005                | 0           | 0.000       | 0.760   | 0.653               |      |
| GSM2458673   | 0.03          | 0              | 0.003        | 0.07              | 0.022                      | 0.022                        | 0.012                           | 0                          | 0                   | 0.068            | 0.063              | 0         | 0.107          | 0              | 0              | 0.013                   | 0                         | 0.023              | 0                    | 0           | 0.000       | 0.771   | 0.639               |      |
| GSM2458674   | 0.014         | 0              | 0.005        | 0.107             | 0.057                      | 0.016                        | 0.045                           | 0                          | 0                   | 0.074            | 0                  | 0.191     | 0              | 0              | 0.008          | 0                       | 0.001                     | 0                  | 0                    | 0           | 0.000       | 0.738   | 0.678               |      |
| GSM2458675   | 0.014         | 0.006          | 0            | 0.175             | 0.075                      | 0.026                        | 0.05                            | 0                          | 0                   | 0.013            | 0.064              | 0         | 0.189          | 0              | 0              | 0                       | 0                         | 0.004              | 0                    | 0           | 0.000       | 0.728   | 0.696               |      |
| GSM2458676   | 0.011         | 0.012          | 0.009        | 0.13              | 0.061                      | 0.011                        | 0.035                           | 0                          | 0                   | 0.078            | 0                  | 0.167     | 0              | 0              | 0              | 0                       | 0.001                     | 0.008              | 0                    | 0           | 0.000       | 0.724   | 0.692               |      |
| GSM2458677   | 0.014         | 0.003          | 0.002        | 0.083             | 0.094                      | 0.02                         | 0.037                           | 0                          | 0                   | 0.072            | 0                  | 0.183     | 0.014          | 0              | 0              | 0                       | 0.001                     | 0.008              | 0                    | 0           | 0.000       | 0.708   | 0.707               |      |
| GSM2458678   | 0.003         | 0.005          | 0.002        | 0.217             | 0.049                      | 0.005                        | 0.039                           | 0                          | 0                   | 0.005            | 0.098              | 0         | 0.202          | 0              | 0              | 0.002                   | 0                         | 0.001              | 0.012                | 0           | 0.000       | 0.718   | 0.706               |      |
| GSM2458679   | 0.03          | 0.008          | 0.003        | 0.106             | 0.086                      | 0.049                        | 0.027                           | 0                          | 0                   | 0.124            | 0                  | 0.132     | 0.001          | 0              | 0              | 0                       | 0                         | 0                  | 0                    | 0           | 0.000       | 0.772   | 0.647               |      |
| GSM2458680   | 0.034         | 0              | 0.02         | 0.094             | 0.081                      | 0                            | 0.064                           | 0                          | 0                   | 0.067            | 0.077              | 0         | 0.093          | 0              | 0              | 0.014                   | 0                         | 0.009              | 0                    | 0           | 0.000       | 0.731   | 0.692               |      |
| GSM2458681   | 0.038         | 0.004          | 0.002        | 0.076             | 0.077                      | 0.061                        | 0.077                           | 0                          | 0                   | 0.093            | 0.093              | 0         | 0.044          | 0              | 0              | 0.012                   | 0                         | 0.009              | 0                    | 0           | 0.000       | 0.734   | 0.692               |      |
| GSM2458682   | 0.044         | 0              | 0.011        | 0.065             | 0.091                      | 0.049                        | 0.041                           | 0                          | 0                   | 0.025            | 0.095              | 0         | 0.099          | 0              | 0              | 0.014                   | 0                         | 0.001              | 0                    | 0           | 0.000       | 0.736   | 0.685               |      |
| GSM2458683   | 0.049         | 0              | 0.006        | 0.007             | 0.114                      | 0                            | 0.027                           | 0                          | 0                   | 0.008            | 0.121              | 0         | 0.003          | 0              | 0              | 0.016                   | 0                         | 0.016              | 0                    | 0           | 0.000       | 0.715   | 0.702               |      |
| GSM2458684   | 0.045         | 0              | 0.003        | 0.005             | 0.12                       | 0                            | 0.046                           | 0                          | 0                   | 0.012            | 0.09               | 0         | 0.076          | 0              | 0              | 0.027                   | 0                         | 0                  | 0                    | 0           | 0.000       | 0.732   | 0.682               |      |
| GSM2458685   | 0.052         | 0              | 0.006        | 0.057             | 0.096                      | 0.015                        | 0.023                           | 0                          | 0                   | 0.005            | 0.082              | 0         | 0.189          | 0              | 0              | 0.003                   | 0                         | 0.01               | 0                    | 0           | 0.000       | 0.742   | 0.676               |      |
| GSM2458686   | 0.053         | 0              | 0.005        | 0.051             | 0.093                      | 0                            | 0.024                           | 0                          | 0                   | 0.109            | 0                  | 0.172     | 0              | 0              | 0.009          | 0                       | 0.007                     | 0                  | 0                    | 0           | 0.000       | 0.740   | 0.676               |      |
| GSM2458687   | 0.05          | 0.001          | 0.001        | 0.045             | 0.074                      | 0.032                        | 0.04                            | 0                          | 0                   | 0.031            | 0.068              | 0         | 0.177          | 0              | 0              | 0                       | 0.004                     | 0.019              | 0                    | 0           | 0.000       | 0.743   | 0.676               |      |
| GSM2458688   | 0.028         | 0              | 0            | 0.05              | 0.074                      | 0.048                        | 0.026                           | 0                          | 0                   | 0.091            | 0                  | 0.072     | 0.004          | 0              | 0              | 0                       | 0                         | 0.012              | 0                    | 0           | 0.000       | 0.761   | 0.651               |      |
| GSM2458689   | 0.054         | 0              | 0            | 0.077             | 0.185                      | 0                            | 0.018                           | 0                          | 0                   | 0.065            | 0.052              | 0         | 0.048          | 0              | 0              | 0.034                   | 0                         | 0                  | 0                    | 0           | 0.000       | 0.713   | 0.706               |      |
| GSM2458690   | 0.02          | 0.003          | 0.003        | 0.034             | 0.076                      | 0                            | 0.031                           | 0                          | 0                   | 0                | 0.063              | 0         | 0.073          | 0.007          | 0              | 0                       | 0                         | 0.017              | 0                    | 0           | 0.000       | 0.750   | 0.667               |      |
| GSM2458691   | 0.003         | 0.009          | 0            | 0                 | 0.125                      | 0                            | 0.03                            | 0                          | 0                   | 0.017            | 0.09               | 0         | 0              | 0.01           | 0              | 0.013                   | 0                         | 0                  | 0                    | 0           | 0.000       | 0.764   | 0.651               |      |
| GSM2458692   | 0.007         | 0.006          | 0.004        | 0.054             | 0.039                      | 0.029                        | 0.05                            | 0                          | 0                   | 0.113            | 0                  | 0.1       | 0              | 0              | 0.009          | 0                       | 0                         | 0.025              | 0                    | 0           | 0.000       | 0.736   | 0.678               |      |
| GSM2458693   | 0.024         | 0              | 0.008        | 0.014             | 0.12                       | 0.024                        | 0.027                           | 0                          | 0                   | 0.012            | 0.097              | 0         | 0.122          | 0              | 0              | 0                       | 0.009                     | 0                  | 0                    | 0           | 0.000       | 0.761   | 0.652               |      |
| GSM2458694   | 0.027         | 0              | 0.004        | 0.069             | 0.107                      | 0.005                        | 0.038                           | 0                          | 0                   | 0.117            | 0                  | 0.099     | 0              | 0              | 0.021          | 0                       | 0                         | 0                  | 0                    | 0           | 0.000       | 0.756   | 0.659               |      |
| GSM2458695   | 0.02          | 0              | 0.006        | 0.106             | 0.016                      | 0.011                        | 0                               | 0                          | 0                   | 0.113            | 0                  | 0.141     | 0              | 0              | 0.015          | 0                       | 0                         | 0.009              | 0                    | 0           | 0.000       | 0.760   | 0.652               |      |
| GSM2458696   | 0.003         | 0.019          | 0.001        | 0.019             | 0.055                      | 0.014                        | 0.047                           | 0                          | 0                   | 0.082            | 0                  | 0.094     | 0              | 0              | 0.011          | 0                       | 0                         | 0.03               | 0                    | 0           | 0.000       | 0.786   | 0.619               |      |
| GSM2458697   | 0.033         | 0              | 0            | 0.178             | 0                          | 0.018                        | 0.004                           | 0                          | 0                   | 0.126            | 0                  | 0.052     | 0.011          | 0              | 0              | 0.002                   | 0                         | 0.01               | 0                    | 0           | 0.000       | 0.725   | 0.691               |      |
| GSM2458698   | 0.026         | 0              | 0.001        | 0.199             | 0                          | 0                            | 0.02                            | 0                          | 0                   | 0.121            | 0                  | 0.095     | 0.009          | 0              | 0              | 0.003                   | 0                         | 0.002              | 0                    | 0           | 0.000       | 0.735   | 0.681               |      |
| GSM2458699   | 0.004         | 0.001          | 0.001        | 0.162             | 0.009                      | 0                            | 0.032                           | 0                          | 0                   | 0.023            | 0.14               | 0         | 0.095          | 0.02           | 0              | 0.004                   | 0                         | 0                  | 0.004                | 0           | 0.000       | 0.706   | 0.710               |      |
| GSM2458700   | 0.3           | 0.007          | 0            | 0.097             | 0.107                      | 0                            | 0.036                           | 0                          | 0                   | 0.109            | 0.025              | 0         | 0              | 0.019          | 0              | 0.008                   | 0                         | 0.004              | 0                    | 0.011       | 0.000       | 0.753   | 0.660               |      |
| GSM2458701   | 0.03          | 0              | 0.008        | 0.104             | 0.118                      | 0.018                        | 0.059                           | 0                          | 0                   | 0.008            | 0.104              | 0         | 0.035          | 0              | 0              | 0.037                   | 0                         | 0                  | 0.006                | 0           | 0.000       | 0.721   | 0.699               |      |
| GSM2458702   | 0.032         | 0              | 0.003        | 0.12              | 0.147                      | 0.008                        | 0.032                           | 0                          | 0                   | 0.021            | 0.059              | 0         | 0.169          | 0              | 0              | 0.008                   | 0                         | 0                  | 0.019                | 0           | 0.000       | 0.708   | 0.714               |      |
| GSM2458703   | 0.013         | 0.003          | 0.002        | 0.047             | 0.093                      | 0                            | 0.023                           | 0                          | 0                   | 0.111            | 0                  | 0.191     | 0.014          | 0              | 0.003          | 0                       | 0                         | 0.005              | 0                    | 0           | 0.000       | 0.772   | 0.641               |      |
| GSM2458704   | 0.024         | 0              | 0.004        | 0.068             | 0.054                      | 0.001                        | 0.042                           | 0                          | 0                   | 0.093            | 0                  | 0.073     | 0.05           | 0              | 0.01           | 0                       | 0.003                     | 0.02               | 0                    | 0           | 0.000       | 0.755   | 0.658               |      |
| GSM2458705   | 0.009         | 0              | 0            | 0.119             | 0.104                      | 0                            | 0.014                           | 0                          | 0                   | 0.099            | 0                  | 0.127     | 0              | 0              | 0.024          | 0                       | 0                         | 0.005              | 0                    | 0           | 0.000       | 0.747   | 0.669               |      |
| GSM2458706   | 0.041         | 0              | 0            | 0.108             | 0.053                      | 0                            | 0.03                            | 0                          | 0                   | 0.039            | 0                  | 0.109     | 0              | 0              | 0              | 0                       | 0                         | 0.017              | 0                    | 0           | 0.000       | 0.789   | 0.617               |      |
| GSM2458707   | 0.062         | 0              | 0            | 0.064             | 0.075                      | 0.008                        | 0.035                           | 0                          | 0                   | 0.062            | 0                  | 0.098     | 0.01           | 0              | 0              | 0                       | 0                         | 0.009              | 0                    | 0           | 0.000       | 0.764   | 0.647               |      |
| GSM2458708   | 0.052         | 0              | 0            | 0.081             | 0.047                      | 0                            | 0.042                           | 0                          | 0                   | 0.002            | 0.06               | 0         | 0.146          | 0              | 0              | 0.002                   | 0                         | 0.003              | 0                    | 0           | 0.000       | 0.799   | 0.606               |      |
| GSM2458709   | 0.033         | 0              | 0.002        | 0.116             | 0.067                      | 0.051                        | 0.051                           | 0                          | 0                   | 0.07             | 0.06               | 0         | 0.123          | 0              | 0              | 0.008                   | 0                         | 0.009              | 0                    | 0           | 0.000       | 0.737   | 0.688               |      |
| GSM2458710   | 0.04          | 0              | 0            | 0.22              | 0.035                      | 0                            | 0.043                           | 0                          | 0                   | 0.091            | 0.012              | 0         | 0.133          | 0              | 0              | 0.025                   | 0                         | 0.01               | 0                    | 0           | 0.000       | 0.715   | 0.708               |      |
| GSM2458711   | 0.03          | 0              | 0            | 0.15              | 0.075                      | 0                            | 0.05                            | 0                          | 0                   | 0.059            | 0.065              | 0         | 0.115          | 0              | 0              | 0.01                    | 0                         | 0.008              | 0.008                | 0           | 0.000       | 0.700   | 0.719               |      |
| GSM2458712   | 0.012         | 0.004          | 0            | 0.045             | 0.055                      | 0                            | 0.03                            | 0                          | 0                   | 0.095            | 0                  | 0.143     | 0.031          | 0              | 0              | 0.015                   | 0                         | 0.002              | 0                    | 0           | 0.000       | 0.752   | 0.660               |      |
| GSM2458713   | 0             | 0.01           | 0.004        | 0.015             | 0.043                      | 0                            | 0.03                            | 0                          | 0                   | 0.09             | 0                  | 0.133     | 0.033          | 0              | 0              | 0.008                   | 0                         | 0.015              | 0                    | 0           | 0.000       | 0.740   | 0.675               |      |
| GSM2458714   | 0             | 0.032          | 0.008        | 0.026             | 0.101                      | 0                            | 0.023                           | 0                          | 0                   | 0.056            | 0.102              | 0         | 0              | 0              | 0.015          | 0                       | 0.001                     | 0                  | 0                    | 0           | 0.000       | 0.734   | 0.681               |      |
| GSM2458715   | 0.049         | 0              | 0            | 0.005             | 0                          | 0                            | 0.014                           | 0                          | 0                   | 0.179            | 0                  | 0.031     | 0              | 0              | 0.008          | 0                       | 0.001                     | 0                  | 0                    | 0           | 0.000       | 0.733   | 0.689               |      |
| GSM2458716   | 0.015         | 0              | 0.015        | 0.031             | 0.049                      | 0.085                        | 0.016                           | 0                          | 0                   | 0.083            | 0                  | 0.094     | 0              | 0              | 0.02           | 0                       | 0                         | 0                  | 0                    | 0           | 0.000       | 0.739   | 0.675               |      |
| GSM2458717   | 0.019         | 0.012          | 0.026        | 0.056             | 0.016                      | 0.023                        | 0                               | 0.001                      | 0                   | 0.075            | 0                  | 0.147     | 0              | 0              | 0.005          | 0                       | 0.003                     | 0.013              | 0                    | 0           | 0.000       | 0.773   | 0.636               |      |
| GSM2458718   | 0.011         | 0              | 0.013        | 0.042             | 0.088                      | 0.029                        | 0.027                           | 0                          | 0                   | 0.08             |                    |           |                |                |                |                         |                           |                    |                      |             |             |         |                     |      |

Appendix 1.4, Dataset 4 (GSE38958)

| Input Sample | B cells naive | B cells memory | Plasma cells | T cells CD8 naive | T cells CD4 memory resting | T cells CD4 memory activated | T cells CD4 Treg | T cells follicular helper | T cells regulatory (Tregs) | T cells gamma delta | NK cells resting | NK cells activated | Monocytes M0 | Macrophages M1 | Macrophages M2 | Macrophages M2 | Dendritic cells resting | Dendritic cells activated | Mast cells resting | Mast cells activated | Eosinophils | Neutrophils | P-value | Pearson Correlation | RMSE  |
|--------------|---------------|----------------|--------------|-------------------|----------------------------|------------------------------|------------------|---------------------------|----------------------------|---------------------|------------------|--------------------|--------------|----------------|----------------|----------------|-------------------------|---------------------------|--------------------|----------------------|-------------|-------------|---------|---------------------|-------|
| GSM952756    | 0.007         | 0.02           | 0.018        | 0.12              | 0.15                       | 0.184                        | 0.021            | 0                         | 0                          | 0                   | 0.121            | 0                  | 0.006        | 0.012          | 0              | 0              | 0                       | 0.01                      | 0.01               | 0                    | 0.005       | 0           | 0.000   | 0.679               | 0.751 |
| GSM952757    | 0.032         | 0.004          | 0.021        | 0.1               | 0.061                      | 0.18                         | 0.002            | 0                         | 0                          | 0                   | 0.106            | 0                  | 0.006        | 0.021          | 0              | 0              | 0                       | 0.01                      | 0.01               | 0                    | 0           | 0           | 0.000   | 0.688               | 0.744 |
| GSM952758    | 0.064         | 0              | 0.005        | 0.2               | 0.18                       | 0.191                        | 0.002            | 0                         | 0                          | 0                   | 0.081            | 0                  | 0.235        | 0.027          | 0              | 0              | 0                       | 0.006                     | 0                  | 0                    | 0.009       | 0           | 0.000   | 0.629               | 0.782 |
| GSM952759    | 0.071         | 0.023          | 0.009        | 0.162             | 0.149                      | 0.162                        | 0.016            | 0                         | 0                          | 0                   | 0.121            | 0                  | 0.252        | 0.017          | 0              | 0              | 0                       | 0.011                     | 0                  | 0                    | 0.005       | 0           | 0.010   | 0.515               | 0.856 |
| GSM952760    | 0.061         | 0              | 0.011        | 0.229             | 0.025                      | 0.234                        | 0.002            | 0                         | 0                          | 0                   | 0.194            | 0                  | 0.153        | 0.009          | 0              | 0              | 0                       | 0.006                     | 0.009              | 0                    | 0.01        | 0.056       | 0.010   | 0.539               | 0.842 |
| GSM952761    | 0.074         | 0              | 0.025        | 0.037             | 0.018                      | 0.191                        | 0.03             | 0                         | 0                          | 0                   | 0.18             | 0                  | 0.113        | 0.006          | 0              | 0              | 0                       | 0.004                     | 0.021              | 0                    | 0           | 0           | 0.000   | 0.687               | 0.746 |
| GSM952762    | 0.041         | 0              | 0            | 0.139             | 0.051                      | 0.199                        | 0.022            | 0                         | 0                          | 0                   | 0.133            | 0                  | 0.006        | 0.027          | 0              | 0              | 0                       | 0.004                     | 0                  | 0                    | 0.018       | 0           | 0.000   | 0.642               | 0.775 |
| GSM952763    | 0.036         | 0.008          | 0.025        | 0.135             | 0.125                      | 0.204                        | 0.008            | 0                         | 0                          | 0                   | 0.154            | 0.013              | 0.239        | 0.025          | 0              | 0              | 0                       | 0.011                     | 0.011              | 0                    | 0.005       | 0           | 0.000   | 0.594               | 0.807 |
| GSM952764    | 0.014         | 0              | 0            | 0.197             | 0.041                      | 0.177                        | 0.047            | 0                         | 0                          | 0                   | 0.156            | 0                  | 0.006        | 0.02           | 0              | 0              | 0                       | 0                         | 0                  | 0                    | 0.011       | 0           | 0.000   | 0.656               | 0.762 |
| GSM952765    | 0.031         | 0              | 0.006        | 0.16              | 0.067                      | 0.162                        | 0.046            | 0                         | 0                          | 0                   | 0.161            | 0                  | 0.006        | 0.025          | 0              | 0              | 0                       | 0.005                     | 0.035              | 0                    | 0.009       | 0           | 0.000   | 0.651               | 0.771 |
| GSM952766    | 0             | 0.016          | 0            | 0.09              | 0.06                       | 0.203                        | 0.032            | 0                         | 0                          | 0                   | 0.073            | 0                  | 0.006        | 0.04           | 0              | 0              | 0                       | 0.011                     | 0                  | 0                    | 0           | 0.008       | 0.000   | 0.744               | 0.700 |
| GSM952767    | 0.029         | 0.029          | 0.001        | 0.036             | 0.001                      | 0.181                        | 0                | 0                         | 0                          | 0                   | 0.151            | 0                  | 0.001        | 0.02           | 0              | 0              | 0                       | 0.001                     | 0.024              | 0                    | 0.004       | 0.025       | 0.000   | 0.744               | 0.694 |
| GSM952768    | 0.015         | 0.034          | 0            | 0.147             | 0.024                      | 0.15                         | 0.019            | 0                         | 0                          | 0                   | 0.095            | 0                  | 0.133        | 0.029          | 0              | 0              | 0                       | 0.009                     | 0.015              | 0                    | 0.012       | 0.018       | 0.000   | 0.705               | 0.731 |
| GSM952769    | 0             | 0.012          | 0            | 0.092             | 0                          | 0.075                        | 0.014            | 0                         | 0                          | 0                   | 0.104            | 0                  | 0.006        | 0.025          | 0              | 0              | 0                       | 0.002                     | 0.029              | 0                    | 0.016       | 0.044       | 0.000   | 0.728               | 0.696 |
| GSM952770    | 0.012         | 0              | 0            | 0.135             | 0                          | 0.136                        | 0.015            | 0                         | 0                          | 0                   | 0.157            | 0                  | 0.006        | 0.023          | 0              | 0              | 0                       | 0.004                     | 0.022              | 0                    | 0.009       | 0           | 0.000   | 0.729               | 0.705 |
| GSM952771    | 0.018         | 0              | 0.003        | 0.088             | 0.019                      | 0.191                        | 0.037            | 0                         | 0                          | 0                   | 0.118            | 0                  | 0.006        | 0.041          | 0              | 0              | 0                       | 0.001                     | 0.019              | 0                    | 0.007       | 0           | 0.000   | 0.718               | 0.721 |
| GSM952772    | 0.017         | 0.009          | 0            | 0.127             | 0                          | 0.166                        | 0.026            | 0                         | 0                          | 0                   | 0.109            | 0.015              | 0.006        | 0.033          | 0              | 0              | 0                       | 0                         | 0.04               | 0                    | 0.015       | 0.009       | 0.000   | 0.746               | 0.701 |
| GSM952773    | 0.015         | 0              | 0            | 0.091             | 0.042                      | 0.112                        | 0.024            | 0                         | 0                          | 0.005               | 0.11             | 0                  | 0.006        | 0.031          | 0              | 0              | 0                       | 0.008                     | 0.016              | 0                    | 0           | 0.072       | 0.000   | 0.785               | 0.645 |
| GSM952774    | 0.025         | 0              | 0.006        | 0.085             | 0                          | 0.124                        | 0.007            | 0                         | 0                          | 0                   | 0.103            | 0.014              | 0.006        | 0.032          | 0              | 0              | 0                       | 0.011                     | 0.026              | 0                    | 0           | 0.018       | 0.000   | 0.750               | 0.685 |
| GSM952775    | 0.046         | 0              | 0            | 0.154             | 0.008                      | 0.092                        | 0.019            | 0                         | 0                          | 0                   | 0.203            | 0                  | 0.111        | 0.031          | 0              | 0              | 0                       | 0                         | 0.035              | 0                    | 0           | 0           | 0.000   | 0.705               | 0.726 |
| GSM952776    | 0.02          | 0              | 0.008        | 0.055             | 0.011                      | 0.149                        | 0.006            | 0                         | 0                          | 0                   | 0.123            | 0                  | 0.006        | 0.02           | 0              | 0              | 0                       | 0.005                     | 0.017              | 0                    | 0.001       | 0           | 0.000   | 0.734               | 0.694 |
| GSM952777    | 0.013         | 0              | 0.011        | 0.114             | 0.019                      | 0.245                        | 0.019            | 0                         | 0                          | 0                   | 0.151            | 0                  | 0.006        | 0.019          | 0              | 0              | 0                       | 0.003                     | 0.017              | 0                    | 0.008       | 0           | 0.000   | 0.697               | 0.736 |
| GSM952778    | 0.025         | 0              | 0            | 0.191             | 0                          | 0.065                        | 0.005            | 0                         | 0                          | 0                   | 0.19             | 0.016              | 0.006        | 0.037          | 0              | 0              | 0                       | 0                         | 0.045              | 0                    | 0           | 0.004       | 0.000   | 0.704               | 0.724 |
| GSM952779    | 0.052         | 0              | 0.002        | 0.06              | 0                          | 0.093                        | 0                | 0                         | 0                          | 0                   | 0.122            | 0                  | 0.006        | 0.023          | 0              | 0              | 0                       | 0                         | 0.04               | 0                    | 0.001       | 0.202       | 0.000   | 0.705               | 0.718 |
| GSM952780    | 0.007         | 0.003          | 0.007        | 0.058             | 0.139                      | 0.126                        | 0.023            | 0                         | 0                          | 0                   | 0.133            | 0                  | 0.006        | 0.017          | 0              | 0              | 0                       | 0.003                     | 0.013              | 0                    | 0           | 0           | 0.000   | 0.692               | 0.737 |
| GSM952781    | 0.02          | 0.002          | 0.002        | 0.12              | 0.001                      | 0.073                        | 0.005            | 0                         | 0.001                      | 0                   | 0.179            | 0                  | 0.006        | 0.018          | 0              | 0              | 0                       | 0.005                     | 0.03               | 0                    | 0.008       | 0           | 0.000   | 0.736               | 0.694 |
| GSM952782    | 0.009         | 0              | 0            | 0.119             | 0.061                      | 0.197                        | 0.001            | 0                         | 0                          | 0                   | 0.132            | 0                  | 0.006        | 0.024          | 0              | 0              | 0                       | 0.002                     | 0.016              | 0                    | 0           | 0           | 0.000   | 0.667               | 0.755 |
| GSM952783    | 0.042         | 0              | 0            | 0.24              | 0.005                      | 0.113                        | 0.017            | 0                         | 0                          | 0                   | 0.165            | 0.011              | 0.006        | 0.022          | 0              | 0              | 0                       | 0.011                     | 0.028              | 0                    | 0.014       | 0           | 0.000   | 0.677               | 0.748 |
| GSM952784    | 0.033         | 0              | 0            | 0.13              | 0                          | 0.136                        | 0.035            | 0                         | 0.023                      | 0                   | 0.257            | 0                  | 0.006        | 0.017          | 0              | 0              | 0                       | 0.004                     | 0.022              | 0                    | 0.003       | 0           | 0.000   | 0.672               | 0.748 |
| GSM952785    | 0.024         | 0              | 0.002        | 0.084             | 0.024                      | 0.132                        | 0.016            | 0                         | 0.035                      | 0                   | 0.208            | 0                  | 0.006        | 0.02           | 0              | 0              | 0                       | 0.003                     | 0.027              | 0                    | 0.006       | 0           | 0.000   | 0.711               | 0.722 |
| GSM952786    | 0.007         | 0.003          | 0            | 0.078             | 0.024                      | 0.106                        | 0                | 0                         | 0.004                      | 0                   | 0.112            | 0                  | 0.006        | 0.044          | 0              | 0              | 0                       | 0                         | 0.015              | 0                    | 0           | 0.055       | 0.000   | 0.727               | 0.697 |
| GSM952787    | 0.041         | 0              | 0.003        | 0.14              | 0                          | 0.203                        | 0.024            | 0                         | 0                          | 0                   | 0.171            | 0                  | 0.006        | 0.015          | 0              | 0              | 0                       | 0                         | 0.018              | 0                    | 0           | 0           | 0.000   | 0.697               | 0.734 |
| GSM952788    | 0.004         | 0.002          | 0            | 0.142             | 0                          | 0.074                        | 0                | 0                         | 0.002                      | 0                   | 0.14             | 0                  | 0.006        | 0.033          | 0              | 0              | 0                       | 0                         | 0.029              | 0                    | 0           | 0.005       | 0.000   | 0.707               | 0.716 |
| GSM952789    | 0.012         | 0              | 0            | 0.108             | 0                          | 0.104                        | 0.008            | 0                         | 0                          | 0                   | 0.181            | 0                  | 0.006        | 0.026          | 0              | 0              | 0                       | 0.001                     | 0.027              | 0                    | 0           | 0.004       | 0.000   | 0.728               | 0.700 |
| GSM952790    | 0.017         | 0              | 0.005        | 0.123             | 0.048                      | 0.188                        | 0.018            | 0                         | 0                          | 0                   | 0.197            | 0                  | 0.006        | 0.012          | 0              | 0              | 0                       | 0.002                     | 0.009              | 0                    | 0.006       | 0           | 0.000   | 0.668               | 0.753 |
| GSM952791    | 0.02          | 0              | 0.016        | 0.043             | 0.059                      | 0.232                        | 0.036            | 0                         | 0                          | 0                   | 0.169            | 0                  | 0.006        | 0.011          | 0              | 0              | 0                       | 0                         | 0.024              | 0                    | 0.011       | 0           | 0.000   | 0.676               | 0.754 |
| GSM952792    | 0.025         | 0              | 0            | 0.091             | 0.06                       | 0.236                        | 0                | 0                         | 0                          | 0                   | 0.195            | 0                  | 0.006        | 0.031          | 0              | 0              | 0                       | 0                         | 0                  | 0                    | 0.008       | 0           | 0.000   | 0.665               | 0.756 |
| GSM952793    | 0.057         | 0              | 0            | 0.093             | 0.075                      | 0.174                        | 0.031            | 0                         | 0                          | 0                   | 0.198            | 0                  | 0.006        | 0.02           | 0              | 0              | 0                       | 0.008                     | 0.007              | 0                    | 0.018       | 0           | 0.000   | 0.647               | 0.772 |
| GSM952794    | 0.071         | 0              | 0.008        | 0.096             | 0                          | 0.205                        | 0.022            | 0                         | 0                          | 0                   | 0.11             | 0.013              | 0.006        | 0.038          | 0              | 0              | 0                       | 0.01                      | 0.017              | 0                    | 0           | 0           | 0.000   | 0.690               | 0.746 |
| GSM952795    | 0.068         | 0              | 0            | 0.102             | 0                          | 0.191                        | 0.019            | 0                         | 0                          | 0                   | 0.104            | 0                  | 0.278        | 0.013          | 0              | 0              | 0                       | 0.013                     | 0                  | 0                    | 0           | 0           | 0.000   | 0.609               | 0.794 |
| GSM952796    | 0.039         | 0              | 0            | 0.078             | 0                          | 0.032                        | 0                | 0                         | 0                          | 0                   | 0.157            | 0                  | 0.006        | 0.001          | 0              | 0              | 0                       | 0.002                     | 0.008              | 0                    | 0.003       | 0.223       | 0.000   | 0.647               | 0.764 |
| GSM952797    | 0.026         | 0              | 0.002        | 0.108             | 0                          | 0.144                        | 0.035            | 0                         | 0                          | 0                   | 0.153            | 0                  | 0.006        | 0.005          | 0              | 0              | 0                       | 0.002                     | 0.037              | 0                    | 0.042       | 0.152       | 0.000   | 0.643               | 0.772 |
| GSM952798    | 0.031         | 0.009          | 0            | 0.202             | 0.027                      | 0.018                        | 0.006            | 0.002                     | 0                          | 0                   | 0.234            | 0.02               | 0.006        | 0.04           | 0              | 0              | 0                       | 0                         | 0.049              | 0                    | 0.006       | 0           | 0.000   | 0.678               | 0.744 |
| GSM952799    | 0.028         | 0              | 0.006        | 0.182             | 0.026                      | 0.033                        | 0.023            | 0                         | 0                          | 0                   | 0.123            | 0.01               | 0.228        | 0.038          | 0              | 0              | 0                       | 0                         | 0.003              | 0                    | 0.012       | 0.001       | 0.000   | 0.631               | 0.776 |
| GSM952800    | 0             | 0.024          | 0            | 0.143             | 0.055                      | 0.136                        | 0.023            | 0                         | 0                          | 0                   | 0.111            | 0                  | 0.006        | 0.043          | 0              | 0              | 0                       | 0                         | 0.019              | 0                    | 0.004       | 0           | 0.000   | 0.709               | 0.727 |
| GSM952801    | 0.049         | 0.006          | 0.012        | 0.086             | 0.101                      | 0.067                        | 0.045            | 0                         | 0                          | 0                   | 0.066            | 0                  | 0.006        | 0.029          | 0              | 0              | 0                       | 0.008                     | 0.043              | 0                    | 0.022       | 0.066       | 0.000   | 0.709               | 0.735 |
| GSM952802    | 0.049         | 0              | 0            | 0.125             | 0                          | 0.167                        | 0                | 0                         | 0                          | 0                   | 0.128            | 0                  | 0.006        | 0.033          | 0              | 0              | 0                       | 0.009                     | 0.006              | 0                    | 0.021       | 0           | 0.000   | 0.679               | 0.747 |
| GSM952803    | 0.04          | 0              | 0.005        | 0.145             | 0                          | 0.053                        | 0.001            | 0                         | 0.019                      | 0                   | 0.12             | 0                  | 0.006        | 0.014          | 0              | 0              | 0                       | 0.002                     | 0.031              | 0                    | 0.015       | 0.002       | 0.000   | 0.731               | 0.700 |
| GSM952804    | 0.063         | 0              | 0.012        | 0.065             | 0.052                      | 0.133                        | 0                | 0                         | 0.032                      | 0                   | 0.16             | 0                  | 0.006        | 0.041          | 0              | 0              | 0                       | 0                         | 0.009              | 0                    | 0           | 0           | 0.000   | 0.690               | 0.742 |
| GSM952805    | 0.051         | 0              | 0.004        | 0.115             | 0.001                      | 0.279                        | 0.029            | 0                         | 0                          | 0                   | 0.112            | 0                  | 0.006        | 0.033          | 0              | 0              | 0                       | 0.011                     | 0                  | 0                    | 0.01        | 0           | 0.000   | 0.652               | 0.771 |
| GSM952806    | 0.038         | 0              | 0            | 0.195             | 0.044                      | 0.193                        | 0.053            | 0                         | 0                          | 0                   | 0.202            | 0                  | 0.259        | 0.011          | 0              | 0              | 0                       | 0.002                     | 0.003              | 0                    | 0           | 0           | 0.000   | 0.632               | 0.777 |
| GSM952807    | 0.113         | 0              | 0.011        | 0.047             | 0.061                      | 0.135                        | 0.035            | 0                         | 0                          | 0                   | 0.142            | 0                  | 0.006        | 0.015          | 0              | 0              | 0                       | 0                         | 0.02               | 0                    | 0           | 0           | 0.000   | 0.713               | 0.730 |
| GSM952808    | 0.027         | 0              | 0.001        | 0.061             | 0.068                      | 0.215                        | 0.044            | 0                         | 0                          | 0                   | 0.142            | 0                  | 0.006        | 0.039          | 0              | 0              | 0                       | 0.009                     | 0.007              | 0                    | 0.006       | 0           | 0.000   | 0.676               | 0.755 |
| GSM952809    | 0.019         | 0              | 0            | 0.158             | 0                          | 0.198                        | 0.02             | 0                         | 0                          | 0                   | 0.169            | 0                  | 0.006        | 0.017          | 0              | 0              | 0                       | 0.005                     | 0.018              | 0                    | 0           | 0           | 0.000   | 0.684               | 0.742 |

| Input Sample | B cells naive | B cells memory | Plasma cells | T cells CD8 naive | T cells CD4 memory resting | CD4 T cells memory activated | CD4 T cells follicular helper | T cells regulatory (Tregs) | T cells gamma delta | NK cells resting | NK cells activated | Monocytes | Macrophages M0 | Macrophages M1 | Macrophages M2 | Dendritic cells resting | Dendritic cells activated | Mast cells resting | Mast cells activated | Eosinophils | Neutrophils | P-value | Pearson Correlation | RMSE  |
|--------------|---------------|----------------|--------------|-------------------|----------------------------|------------------------------|-------------------------------|----------------------------|---------------------|------------------|--------------------|-----------|----------------|----------------|----------------|-------------------------|---------------------------|--------------------|----------------------|-------------|-------------|---------|---------------------|-------|
| GSM952853    | 0.014         | 0              | 0            | 0.117             | 0.053                      | 0.157                        | 0.049                         | 0                          | 0.011               | 0                | 0.233              | 0         | 0.231          | 0.016          | 0              | 0                       | 0                         | 0.019              | 0                    | 0           | 0           | 0.000   | 0.660               | 0.758 |
| GSM952854    | 0.012         | 0              | 0            | 0.156             | 0                          | 0.06                         | 0.022                         | 0                          | 0                   | 0.191            | 0                  | 0.173     | 0.045          | 0              | 0              | 0                       | 0                         | 0.042              | 0                    | 0           | 0           | 0.000   | 0.707               | 0.721 |
| GSM952855    | 0.041         | 0              | 0.009        | 0.14              | 0.068                      | 0.221                        | 0.103                         | 0                          | 0                   | 0.108            | 0                  | 0.26      | 0.023          | 0              | 0              | 0                       | 0.01                      | 0.033              | 0                    | 0.004       | 0           | 0.000   | 0.594               | 0.810 |
| GSM952856    | 0.05          | 0              | 0.002        | 0.223             | 0.057                      | 0.035                        | 0.036                         | 0                          | 0                   | 0.129            | 0                  | 0.171     | 0.023          | 0              | 0              | 0                       | 0.009                     | 0.009              | 0                    | 0           | 0           | 0.000   | 0.723               | 0.715 |
| GSM952857    | 0.034         | 0              | 0.02         | 0.161             | 0.032                      | 0.084                        | 0.025                         | 0                          | 0                   | 0.178            | 0                  | 0.13      | 0.02           | 0              | 0              | 0                       | 0.004                     | 0.026              | 0                    | 0           | 0           | 0.000   | 0.736               | 0.705 |
| GSM952858    | 0.031         | 0              | 0            | 0.14              | 0.028                      | 0.114                        | 0                             | 0                          | 0                   | 0.229            | 0                  | 0.157     | 0.004          | 0              | 0              | 0                       | 0.013                     | 0                  | 0                    | 0.013       | 0.1         | 0.000   | 0.666               | 0.751 |
| GSM952859    | 0.068         | 0.08           | 0            | 0.218             | 0.012                      | 0                            | 0.01                          | 0                          | 0                   | 0.092            | 0.004              | 0.159     | 0.028          | 0              | 0              | 0                       | 0.003                     | 0.023              | 0                    | 0.008       | 0           | 0.000   | 0.664               | 0.760 |
| GSM952860    | 0.028         | 0              | 0            | 0.126             | 0                          | 0.069                        | 0.032                         | 0                          | 0                   | 0.142            | 0.003              | 0.17      | 0.085          | 0              | 0              | 0                       | 0                         | 0.046              | 0                    | 0           | 0           | 0.000   | 0.700               | 0.733 |
| GSM952861    | 0.033         | 0              | 0.013        | 0.067             | 0.087                      | 0.197                        | 0.01                          | 0                          | 0                   | 0.093            | 0                  | 0.151     | 0.016          | 0              | 0              | 0                       | 0.005                     | 0.013              | 0                    | 0           | 0.014       | 0.000   | 0.709               | 0.728 |
| GSM952862    | 0.008         | 0              | 0            | 0.083             | 0                          | 0.169                        | 0                             | 0                          | 0                   | 0.204            | 0                  | 0.173     | 0.026          | 0              | 0              | 0                       | 0.005                     | 0.029              | 0                    | 0.003       | 0           | 0.000   | 0.680               | 0.742 |
| GSM952863    | 0.061         | 0              | 0.011        | 0.052             | 0.045                      | 0.123                        | 0.002                         | 0                          | 0                   | 0.109            | 0                  | 0.187     | 0.033          | 0              | 0              | 0                       | 0.001                     | 0                  | 0                    | 0           | 0.176       | 0.000   | 0.678               | 0.739 |
| GSM952864    | 0.017         | 0.007          | 0.015        | 0.014             | 0.023                      | 0.103                        | 0                             | 0                          | 0.052               | 0                | 0.176              | 0         | 0.155          | 0.038          | 0              | 0                       | 0                         | 0.03               | 0                    | 0           | 0.005       | 0.000   | 0.759               | 0.671 |
| GSM952865    | 0.044         | 0              | 0            | 0.104             | 0.004                      | 0.136                        | 0.024                         | 0                          | 0                   | 0.251            | 0                  | 0.157     | 0.02           | 0              | 0              | 0                       | 0.002                     | 0.027              | 0                    | 0.002       | 0           | 0.000   | 0.683               | 0.741 |
| GSM952866    | 0.058         | 0              | 0            | 0.036             | 0.022                      | 0.16                         | 0.015                         | 0                          | 0                   | 0.072            | 0                  | 0.177     | 0.021          | 0              | 0              | 0                       | 0.001                     | 0.016              | 0                    | 0.015       | 0.012       | 0.000   | 0.750               | 0.684 |
| GSM952867    | 0             | 0.013          | 0            | 0.076             | 0.133                      | 0.103                        | 0.022                         | 0                          | 0                   | 0.039            | 0                  | 0.167     | 0.032          | 0              | 0              | 0                       | 0.009                     | 0.004              | 0                    | 0.017       | 0           | 0.010   | 0.548               | 0.836 |
| GSM952868    | 0.003         | 0.011          | 0.006        | 0.05              | 0                          | 0.127                        | 0                             | 0                          | 0                   | 0.13             | 0                  | 0.181     | 0.044          | 0              | 0              | 0                       | 0.005                     | 0.027              | 0                    | 0           | 0.015       | 0.000   | 0.714               | 0.710 |
| GSM952869    | 0.056         | 0              | 0            | 0.047             | 0.106                      | 0.136                        | 0.034                         | 0                          | 0                   | 0.143            | 0                  | 0.168     | 0.023          | 0              | 0              | 0                       | 0.013                     | 0.016              | 0                    | 0           | 0.035       | 0.000   | 0.677               | 0.754 |
| GSM952870    | 0.04          | 0              | 0            | 0.139             | 0                          | 0.196                        | 0.052                         | 0                          | 0                   | 0.197            | 0                  | 0.145     | 0.009          | 0              | 0              | 0                       | 0                         | 0.016              | 0                    | 0.006       | 0           | 0.000   | 0.649               | 0.768 |
