# Supplementary material
Source: PubMed Central journal article supplement (PMC6431574)
Supplement: NIHMS1508565-supplement-2.pdf [file NIHMS1508565-supplement-2.pdf]

**Appendix 2, Table 1:** Summary statistics for cell proportions (in percentages) for the 94 subjects from GSE28042 (Dataset 1)

|                              | mean  | minimum | maximum | standard deviation |
|------------------------------|-------|---------|---------|--------------------|
| Macrophages.M1               | 0.02  | 0.00    | 0.27    | 0.05               |
| Dendritic.cells.resting      | 0.02  | 0.00    | 0.44    | 0.08               |
| Neutrophils                  | 0.06  | 0.00    | 1.56    | 0.22               |
| Eosinophils                  | 0.06  | 0.00    | 1.03    | 0.20               |
| Mast.cells.activated         | 0.06  | 0.00    | 3.83    | 0.43               |
| Dendritic.cells.activated    | 0.09  | 0.00    | 1.07    | 0.21               |
| Macrophages.M2               | 0.14  | 0.00    | 1.94    | 0.31               |
| T.cells.follicular.helper    | 0.24  | 0.00    | 3.11    | 0.48               |
| Plasma.cells                 | 0.29  | 0.00    | 11.00   | 1.16               |
| T.cells.gamma.delta          | 0.38  | 0.00    | 9.53    | 1.36               |
| NK.cells.activated           | 0.58  | 0.00    | 5.95    | 1.24               |
| Macrophages.M0               | 0.70  | 0.00    | 2.83    | 0.68               |
| B.cells.memory               | 0.80  | 0.00    | 8.18    | 1.51               |
| T.cells.regulatory..Tregs.   | 0.98  | 0.00    | 3.14    | 0.90               |
| B.cells.naive                | 1.74  | 0.00    | 10.52   | 2.18               |
| Mast.cells.resting           | 1.96  | 0.00    | 5.65    | 1.20               |
| T.cells.CD4.memory.resting   | 2.56  | 0.00    | 21.61   | 4.45               |
| T.cells.CD4.naive            | 2.83  | 0.00    | 19.94   | 4.04               |
| T.cells.CD4.memory.activated | 4.81  | 0.30    | 11.41   | 2.82               |
| NK.cells.resting             | 8.59  | 0.00    | 18.86   | 4.27               |
| T.cells.CD8                  | 21.16 | 1.71    | 51.31   | 11.00              |
| Monocytes                    | 51.93 | 26.58   | 77.14   | 11.19              |

**Appendix 2, Table 2:** Summary statistics for cell proportions (in percentages) for the 45 subjects from GSE27957 (Dataset 2)

|                              | mean  | minimum | maximum | standard deviation |
|------------------------------|-------|---------|---------|--------------------|
| T.cells.follicular.helper    | 0     | 0       | 0       | 0                  |
| Macrophages.M1               | 0     | 0       | 0       | 0                  |
| Dendritic.cells.resting      | 0     | 0       | 0       | 0                  |
| T.cells.gamma.delta          | 0     | 0       | 0.13    | 0.02               |
| NK.cells.activated           | 0.01  | 0       | 0.39    | 0.06               |
| Mast.cells.activated         | 0.01  | 0       | 0.46    | 0.07               |
| Dendritic.cells.activated    | 0.26  | 0       | 1.12    | 0.32               |
| Eosinophils                  | 0.37  | 0       | 5.52    | 0.98               |
| Macrophages.M0               | 0.64  | 0       | 6.22    | 1.06               |
| T.cells.regulatory..Tregs.   | 0.67  | 0       | 3.73    | 1.12               |
| Plasma.cells                 | 0.74  | 0       | 1.7     | 0.56               |
| Mast.cells.resting           | 1.1   | 0       | 4.1     | 1.13               |
| Macrophages.M2               | 1.49  | 0       | 3.89    | 1.16               |
| B.cells.memory               | 2.05  | 0       | 15.46   | 2.59               |
| T.cells.CD4.memory.activated | 2.06  | 0       | 10.26   | 2.07               |
| B.cells.naive                | 2.98  | 0       | 9.54    | 2.98               |
| T.cells.CD4.naive            | 5.99  | 0       | 19.91   | 5.91               |
| Neutrophils                  | 7.25  | 0       | 52.23   | 8.81               |
| T.cells.CD8                  | 9.31  | 2.61    | 25.24   | 4.64               |
| T.cells.CD4.memory.resting   | 11.96 | 0.43    | 24.83   | 6.02               |
| NK.cells.resting             | 16.56 | 1.64    | 29.98   | 6.32               |
| Monocytes                    | 36.55 | 8.96    | 50.03   | 8.27               |

**Appendix 2, Table 3:** Summary statistics for cell proportions (in percentages) for the 45 subjects from GSE27957 after re-scaling using neutrophil proportions (Dataset 2)

|                              | mean  | minimum | maximum | standard deviation |
|------------------------------|-------|---------|---------|--------------------|
| T.cells.follicular.helper    | 0.00  | 0.00    | 0.00    | 0.00               |
| Macrophages.M1               | 0.00  | 0.00    | 0.00    | 0.00               |
| Dendritic.cells.resting      | 0.00  | 0.00    | 0.00    | 0.00               |
| T.cells.gamma.delta          | 0.00  | 0.00    | 0.14    | 0.02               |
| NK.cells.activated           | 0.01  | 0.00    | 0.41    | 0.06               |
| Mast.cells.activated         | 0.01  | 0.00    | 0.58    | 0.09               |
| Dendritic.cells.activated    | 0.28  | 0.00    | 1.25    | 0.34               |
| Eosinophils                  | 0.39  | 0.00    | 6.08    | 1.06               |
| Macrophages.M0               | 0.68  | 0.00    | 6.37    | 1.10               |
| T.cells.regulatory..Tregs.   | 0.78  | 0.00    | 5.06    | 1.38               |
| Plasma.cells                 | 0.82  | 0.00    | 1.79    | 0.62               |
| Mast.cells.resting           | 1.20  | 0.00    | 4.46    | 1.21               |
| Macrophages.M2               | 1.62  | 0.00    | 4.21    | 1.27               |
| T.cells.CD4.memory.activated | 2.17  | 0.00    | 10.57   | 2.15               |
| B.cells.memory               | 2.27  | 0.00    | 16.86   | 2.87               |
| B.cells.naive                | 3.29  | 0.00    | 11.76   | 3.37               |
| T.cells.CD4.naive            | 6.37  | 0.00    | 21.21   | 6.14               |
| T.cells.CD8                  | 9.98  | 3.07    | 26.12   | 4.79               |
| T.cells.CD4.memory.resting   | 12.86 | 0.47    | 26.11   | 6.30               |
| NK.cells.resting             | 17.91 | 1.74    | 31.31   | 6.68               |
| Monocytes                    | 39.36 | 18.70   | 61.85   | 8.90               |

**Appendix 2, Table 4:** Summary statistics for cell proportions (in percentages) for the combined 120 subjects from GSE28042 and GSE27957 (Datasets 1 and 2)

|                              | mean  | minimum | maximum | standard deviation |
|------------------------------|-------|---------|---------|--------------------|
| Dendritic.cells.resting      | 0.01  | 0.00    | 0.29    | 0.04               |
| Macrophages.M1               | 0.01  | 0.00    | 0.20    | 0.03               |
| Mast.cells.activated         | 0.05  | 0.00    | 3.83    | 0.39               |
| Dendritic.cells.activated    | 0.16  | 0.00    | 1.25    | 0.29               |
| T.cells.follicular.helper    | 0.18  | 0.00    | 3.11    | 0.44               |
| Eosinophils                  | 0.18  | 0.00    | 6.08    | 0.68               |
| T.cells.gamma.delta          | 0.27  | 0.00    | 9.53    | 1.20               |
| NK.cells.activated           | 0.39  | 0.00    | 5.95    | 1.05               |
| Plasma.cells                 | 0.51  | 0.00    | 11.00   | 1.11               |
| Macrophages.M0               | 0.65  | 0.00    | 6.37    | 0.83               |
| Macrophages.M2               | 0.69  | 0.00    | 4.21    | 1.08               |
| T.cells.regulatory..Tregs.   | 0.91  | 0.00    | 5.06    | 1.11               |
| B.cells.memory               | 1.29  | 0.00    | 16.86   | 2.19               |
| Mast.cells.resting           | 1.60  | 0.00    | 5.22    | 1.20               |
| B.cells.naive                | 2.27  | 0.00    | 11.76   | 2.81               |
| T.cells.CD4.memory.activated | 3.55  | 0.00    | 11.41   | 2.61               |
| T.cells.CD4.naive            | 3.94  | 0.00    | 21.21   | 5.10               |
| T.cells.CD4.memory.resting   | 6.04  | 0.00    | 26.11   | 7.29               |
| NK.cells.resting             | 11.71 | 0.00    | 31.31   | 7.12               |
| T.cells.CD8                  | 16.94 | 2.56    | 51.31   | 10.57              |
| Monocytes                    | 48.63 | 18.70   | 77.14   | 12.26              |

**Appendix 2, Table 5:** Summary statistics for cell proportions (in percentages) for the 77 subjects from GSE93606 (Dataset 3)

|                              | mean  | min   | max   | sd    |
|------------------------------|-------|-------|-------|-------|
| B.cells.naive                | 2.47  | 0.00  | 10.08 | 2.03  |
| B.cells.memory               | 0.36  | 0.00  | 2.36  | 0.60  |
| Plasma.cells                 | 0.50  | 0.00  | 5.52  | 0.83  |
| T.cells.CD8                  | 8.22  | 0.60  | 22.50 | 4.78  |
| T.cells.CD4.naive            | 9.18  | 2.34  | 22.11 | 4.36  |
| T.cells.CD4.memory.resting   | 3.51  | 0.00  | 12.18 | 3.47  |
| T.cells.CD4.memory.activated | 3.55  | 0.20  | 10.10 | 1.58  |
| T.cells.follicular.helper    | 0.00  | 0.00  | 0.00  | 0.00  |
| T.cells.regulatory..Tregs.   | 0.00  | 0.00  | 0.04  | 0.01  |
| T.cells.gamma.delta          | 1.51  | 0.00  | 10.32 | 2.26  |
| NK.cells.resting             | 9.61  | 0.00  | 24.69 | 4.35  |
| NK.cells.activated           | 0.00  | 0.00  | 0.26  | 0.03  |
| Monocytes                    | 11.79 | 0.00  | 22.65 | 4.81  |
| Macrophages.M0               | 0.33  | 0.00  | 4.79  | 0.79  |
| Macrophages.M1               | 0.00  | 0.00  | 0.00  | 0.00  |
| Macrophages.M2               | 0.74  | 0.00  | 4.59  | 0.86  |
| Dendritic.cells.resting      | 0.00  | 0.00  | 0.00  | 0.00  |
| Dendritic.cells.activated    | 0.25  | 0.00  | 1.04  | 0.27  |
| Mast.cells.resting           | 0.82  | 0.00  | 3.15  | 0.71  |
| Mast.cells.activated         | 0.01  | 0.00  | 0.38  | 0.05  |
| Eosinophils                  | 0.00  | 0.00  | 0.20  | 0.02  |
| Neutrophils                  | 47.15 | 23.01 | 70.60 | 10.34 |

**Appendix 2, Table 6:** Summary statistics for cell proportions (in percentages) for the 115 subjects from GSE38958 (Dataset 4)

|                              | mean  | minimum | maximum | standard deviation |
|------------------------------|-------|---------|---------|--------------------|
| Macrophages.M1               | 0.00  | 0.00    | 0.00    | 0.00               |
| Dendritic.cells.resting      | 0.00  | 0.00    | 0.00    | 0.00               |
| Mast.cells.activated         | 0.00  | 0.00    | 0.00    | 0.00               |
| T.cells.follicular.helper    | 0.01  | 0.00    | 0.62    | 0.06               |
| T.cells.gamma.delta          | 0.01  | 0.00    | 0.45    | 0.05               |
| Macrophages.M2               | 0.01  | 0.00    | 0.75    | 0.08               |
| T.cells.regulatory..Tregs.   | 0.17  | 0.00    | 3.50    | 0.62               |
| NK.cells.activated           | 0.19  | 0.00    | 3.67    | 0.55               |
| Plasma.cells                 | 0.38  | 0.00    | 2.48    | 0.61               |
| Dendritic.cells.activated    | 0.44  | 0.00    | 1.32    | 0.41               |
| B.cells.memory               | 0.46  | 0.00    | 7.98    | 1.05               |
| Eosinophils                  | 0.62  | 0.00    | 5.15    | 0.86               |
| Mast.cells.resting           | 1.95  | 0.00    | 6.19    | 1.42               |
| Neutrophils                  | 2.03  | 0.00    | 32.98   | 5.90               |
| T.cells.CD4.memory.activated | 2.14  | 0.00    | 10.28   | 1.77               |
| Macrophages.M0               | 2.67  | 0.11    | 9.77    | 1.50               |
| B.cells.naive                | 3.20  | 0.00    | 11.87   | 2.70               |
| T.cells.CD4.naive            | 3.94  | 0.00    | 19.13   | 4.42               |
| T.cells.CD8                  | 11.76 | 0.06    | 27.74   | 5.02               |
| NK.cells.resting             | 14.35 | 3.91    | 28.03   | 4.83               |
| T.cells.CD4.memory.resting   | 15.26 | 0.00    | 33.40   | 6.87               |
| Monocytes                    | 40.41 | 15.27   | 58.68   | 8.94               |

**Appendix 2, Table 7:** Summary statistics for cell proportions (in percentages) for the 115 subjects from GSE38958 (re-scaled using neutrophil proportions) (Dataset 4)

|                              | mean  | min   | max   | sd   |
|------------------------------|-------|-------|-------|------|
| T.cells.follicular.helper    | 0.01  | 0.00  | 0.62  | 0.06 |
| T.cells.gamma.delta          | 0.01  | 0.00  | 0.49  | 0.05 |
| Macrophages.M2               | 0.01  | 0.00  | 0.78  | 0.08 |
| T.cells.regulatory..Tregs.   | 0.17  | 0.00  | 3.50  | 0.62 |
| NK.cells.activated           | 0.20  | 0.00  | 3.67  | 0.55 |
| Plasma.cells                 | 0.39  | 0.00  | 2.48  | 0.62 |
| Dendritic.cells.activated    | 0.45  | 0.00  | 1.61  | 0.43 |
| B.cells.memory               | 0.46  | 0.00  | 7.98  | 1.05 |
| Eosinophils                  | 0.64  | 0.00  | 5.15  | 0.90 |
| Mast.cells.resting           | 1.99  | 0.00  | 6.19  | 1.45 |
| T.cells.CD4.memory.activated | 2.17  | 0.00  | 10.28 | 1.78 |
| Macrophages.M0               | 2.73  | 0.16  | 9.77  | 1.56 |
| B.cells.naive                | 3.31  | 0.00  | 11.87 | 2.81 |
| T.cells.CD4.naive            | 3.99  | 0.00  | 19.13 | 4.43 |
| T.cells.CD8                  | 12.01 | 0.06  | 27.74 | 5.11 |
| NK.cells.resting             | 14.68 | 3.91  | 28.03 | 4.89 |
| T.cells.CD4.memory.resting   | 15.50 | 0.00  | 33.40 | 6.85 |
| Monocytes                    | 41.31 | 16.18 | 64.53 | 9.13 |
